# Supplementary material
Source: ML conference proceedings conference paper supplement (https://openreview.net/forum?id=ijL7phwr5k)

IMLP Performance Stability

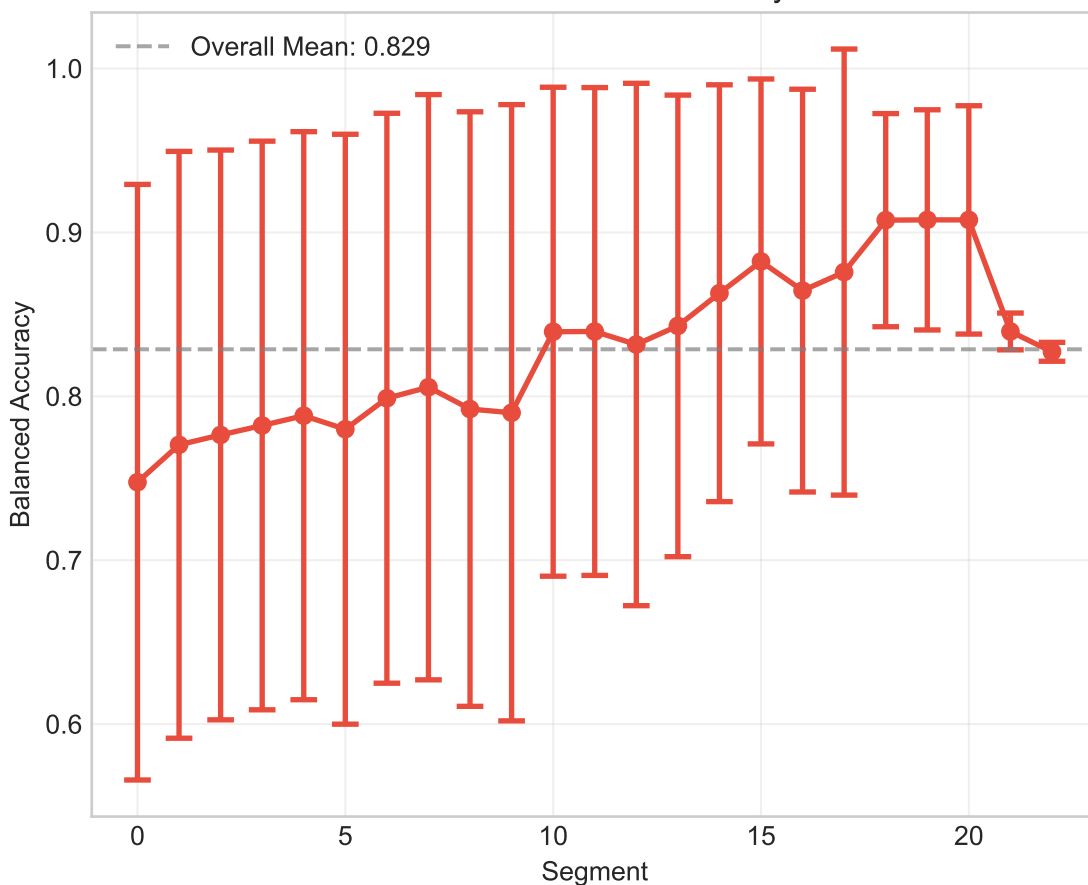

IMLP Energy Consistency

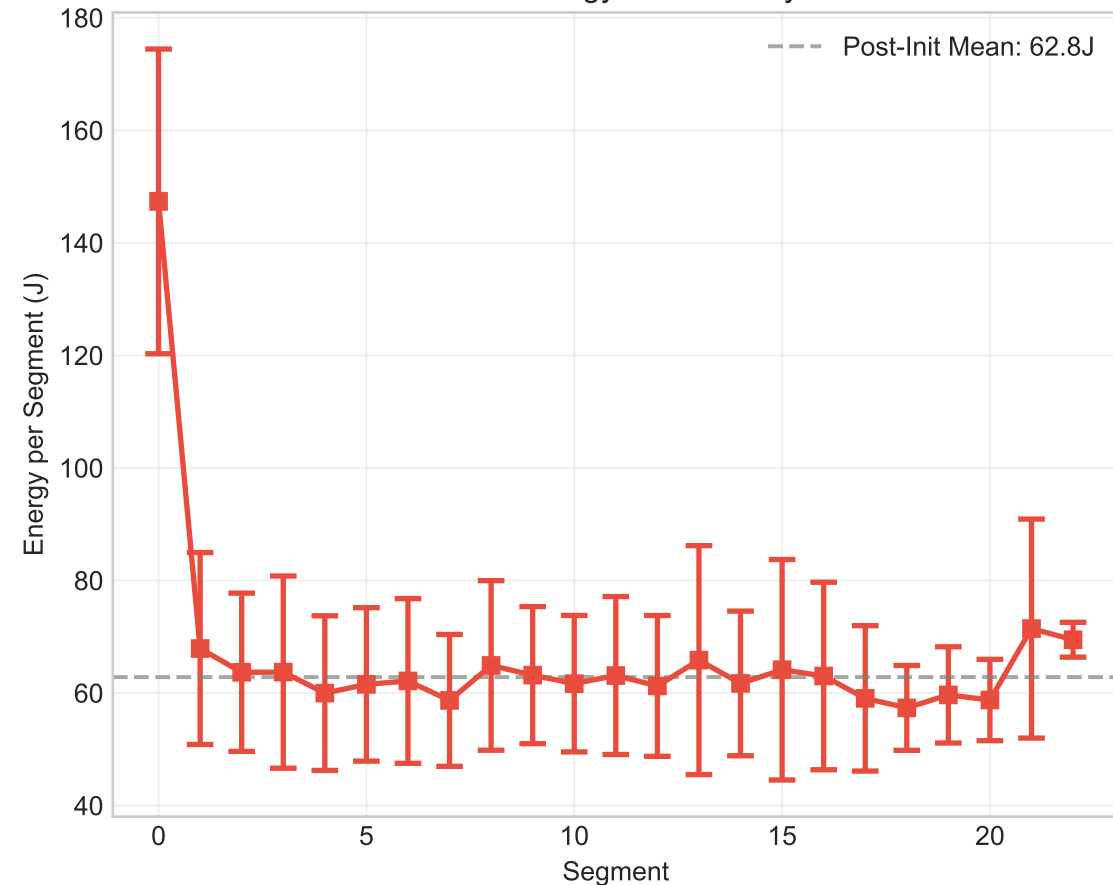

Dataset Coverage by Segment

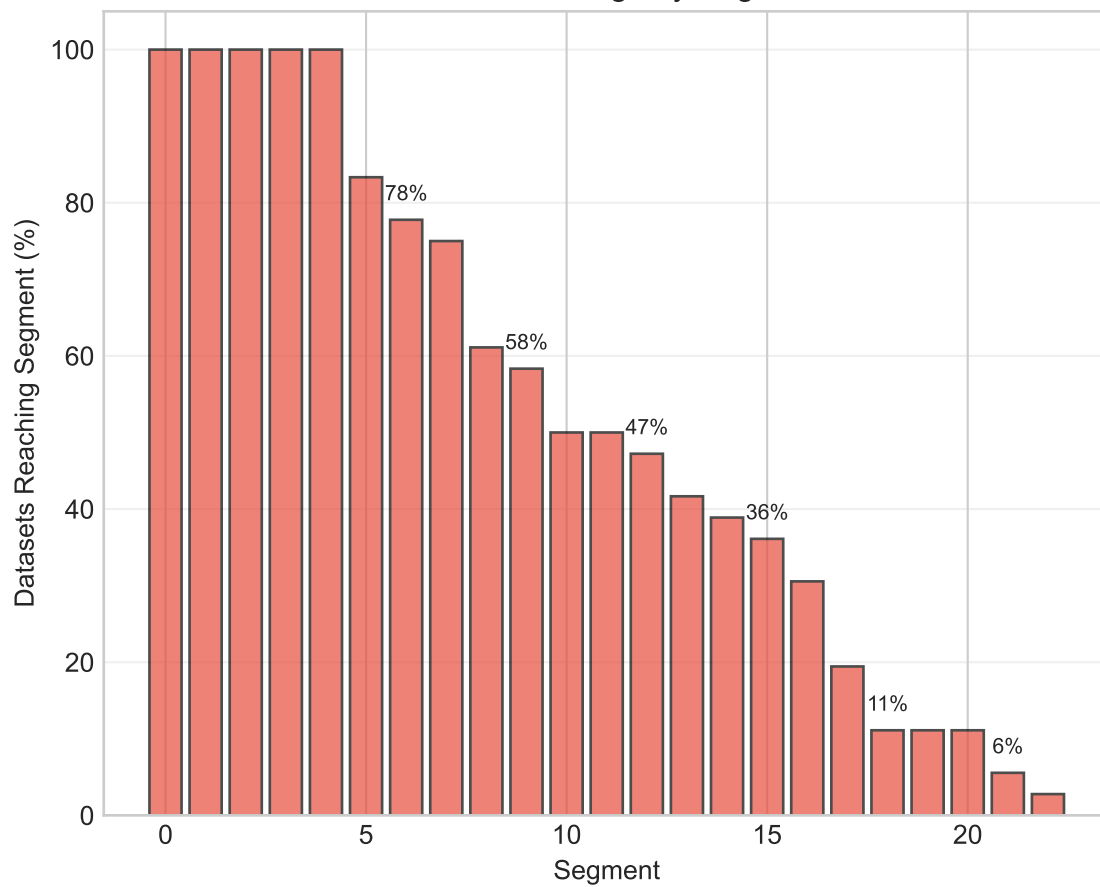

Learning Progress: IMLP vs MLP

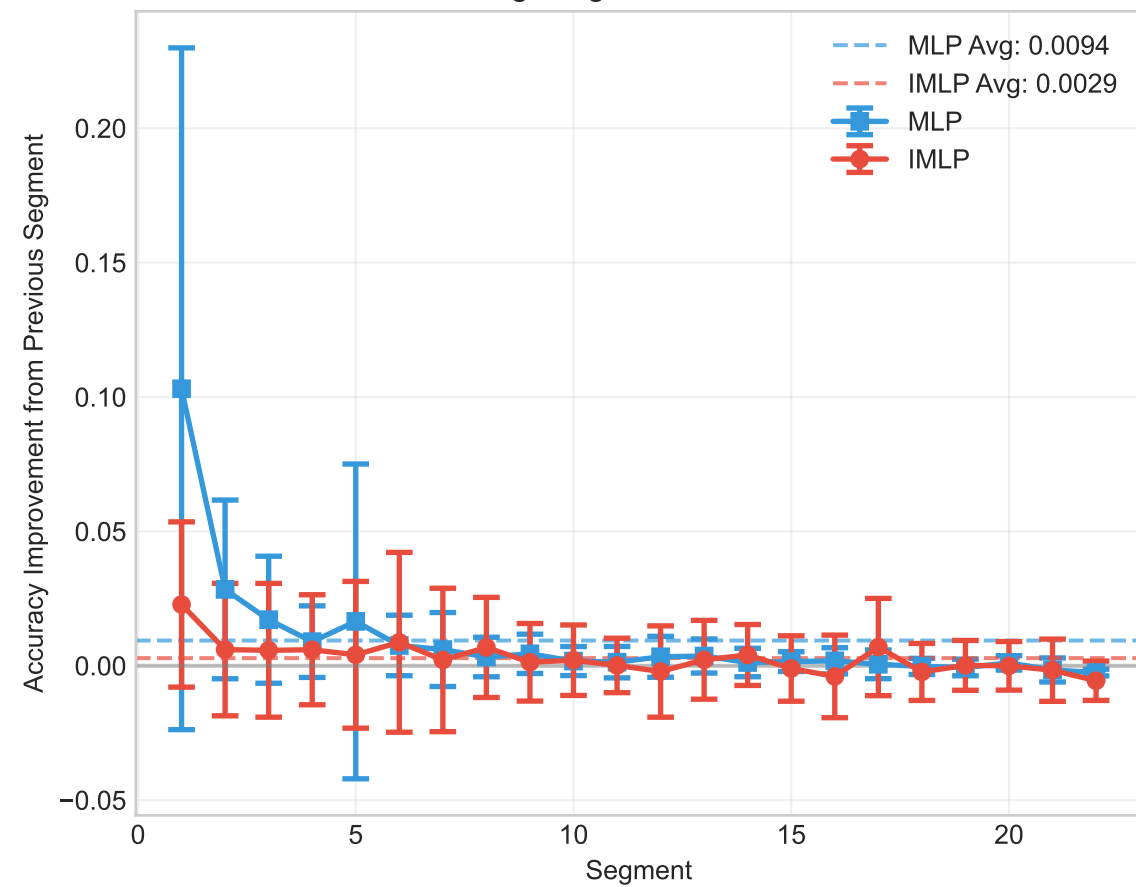

Supplement: supplementary_material [file imlp_segmental_analysis.pdf › plotting/appendix_figures/imlp_segmental_analysis.pdf]
