# Supplementary material
Source: ML conference proceedings conference paper supplement (https://openreview.net/forum?id=ijL7phwr5k)

# Learning Dynamics: IMLP (Segmental) vs Baselines (Cumulative) - All Segments

## Balanced Accuracy vs Segment

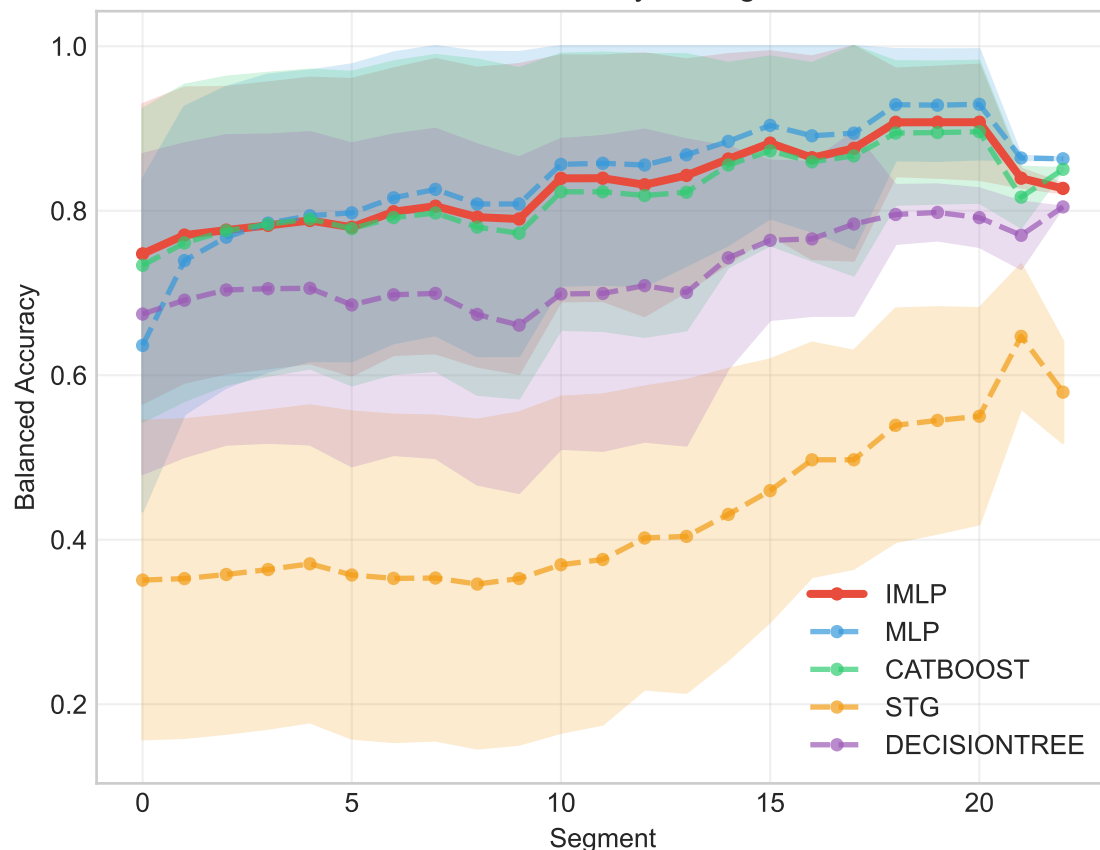

## Log-Loss vs Segment

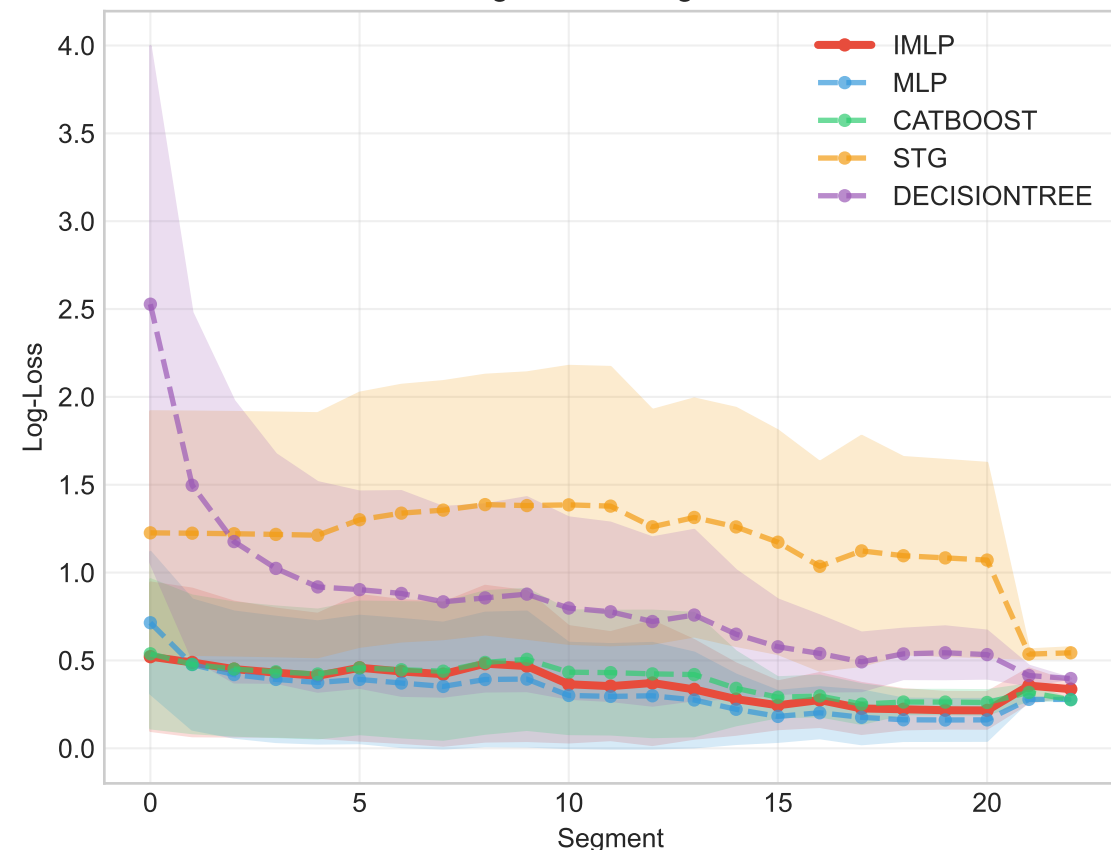

## Energy (J) vs Segment

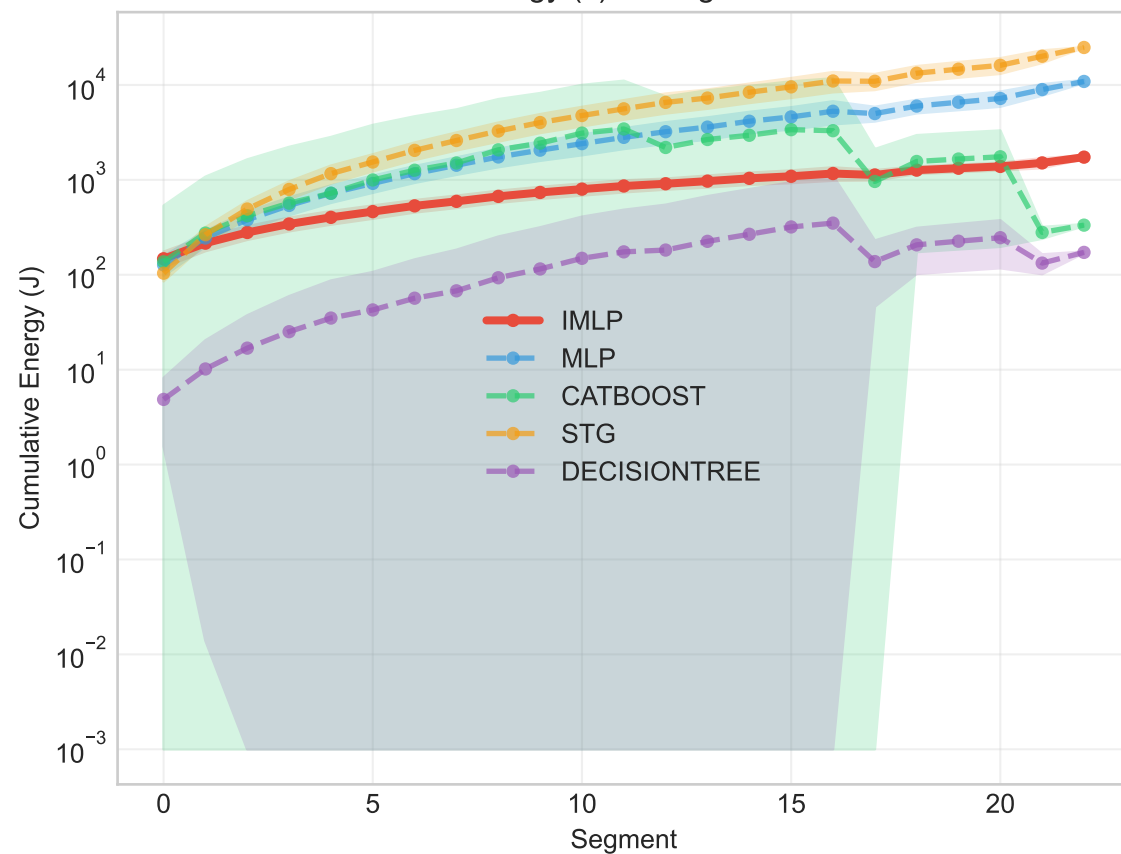

## Time (s) vs Segment

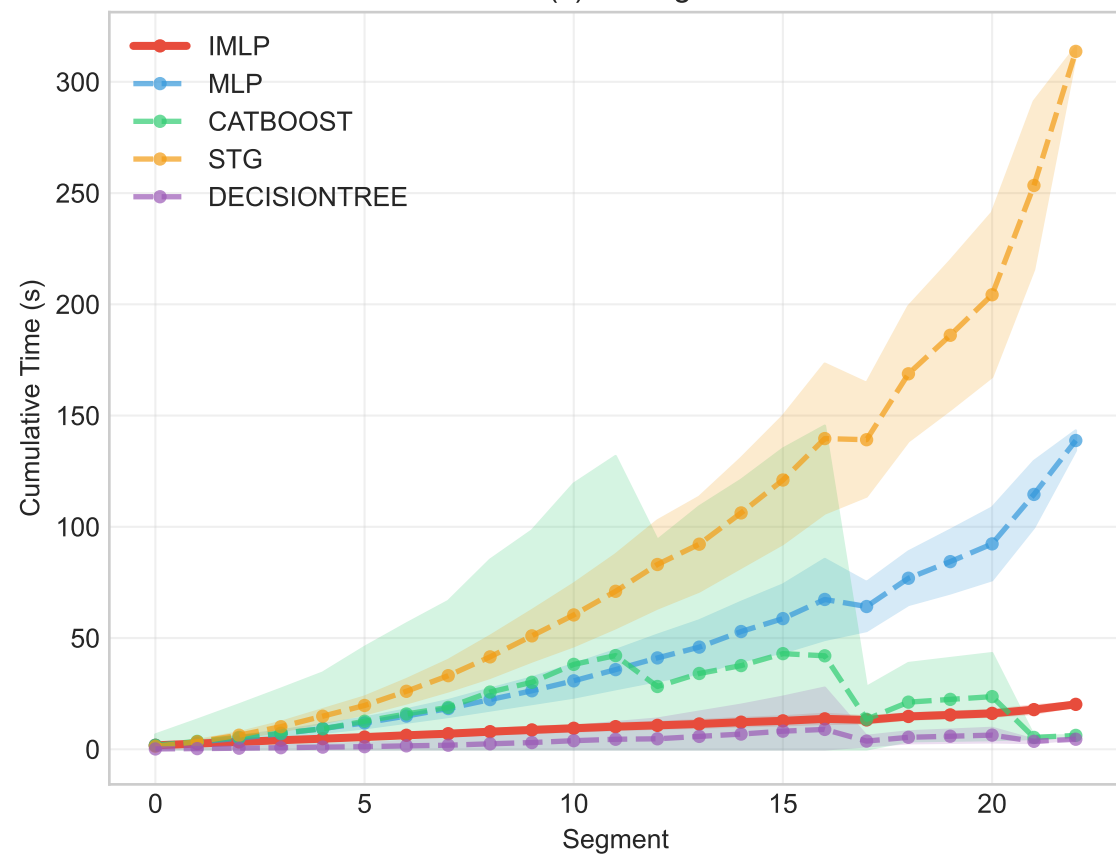

Supplement: supplementary_material [file learning_curves_comparison.pdf › plotting/appendix_figures/learning_curves_comparison.pdf]
