# Supplementary material
Source: ML conference proceedings conference paper supplement (https://openreview.net/forum?id=ijL7phwr5k)

Balanced Accuracy vs Segment

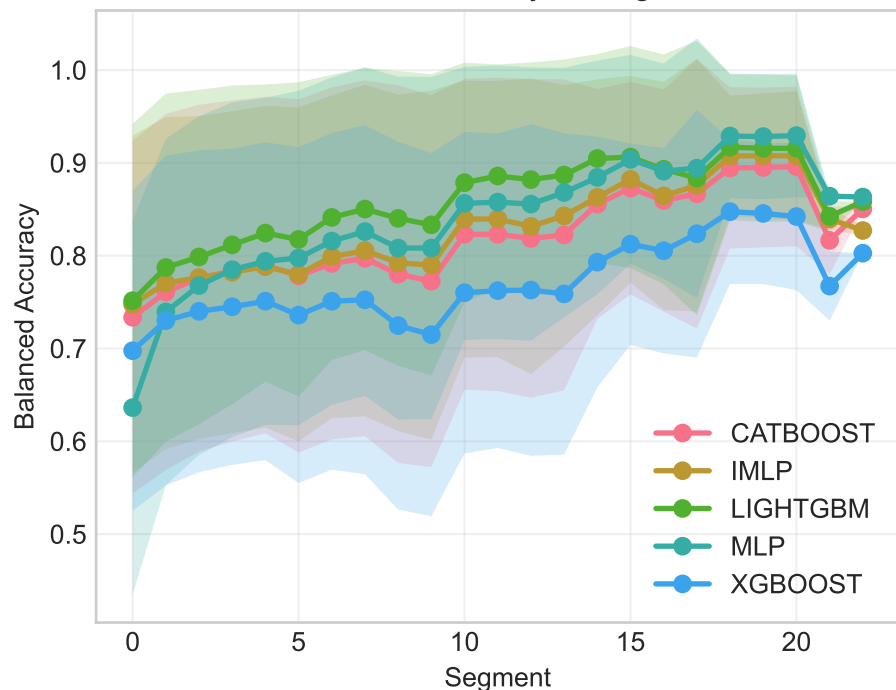

Cumulative Energy (J) vs Segment

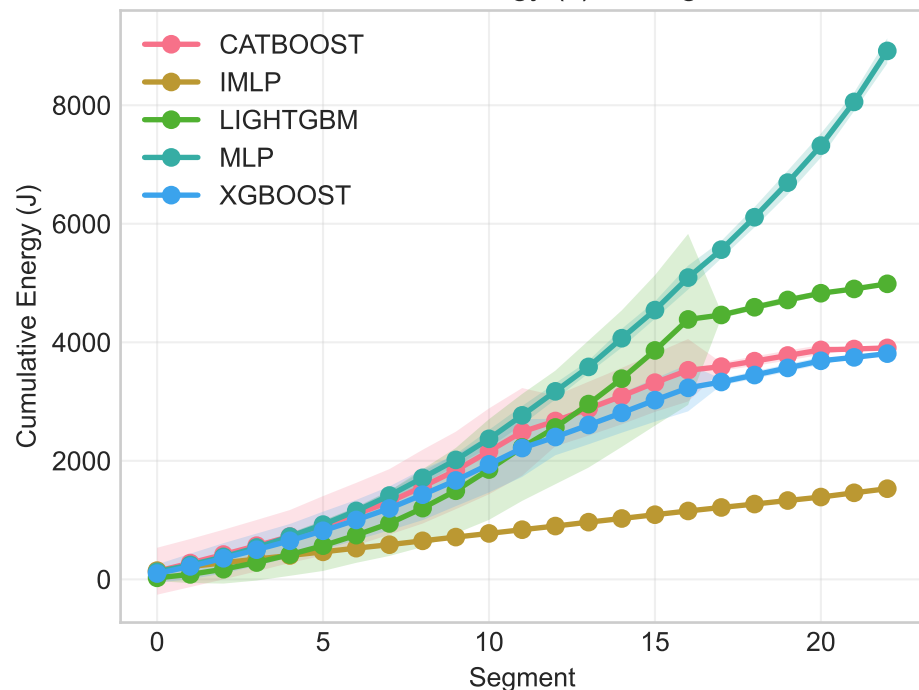

Training Instances vs Segment

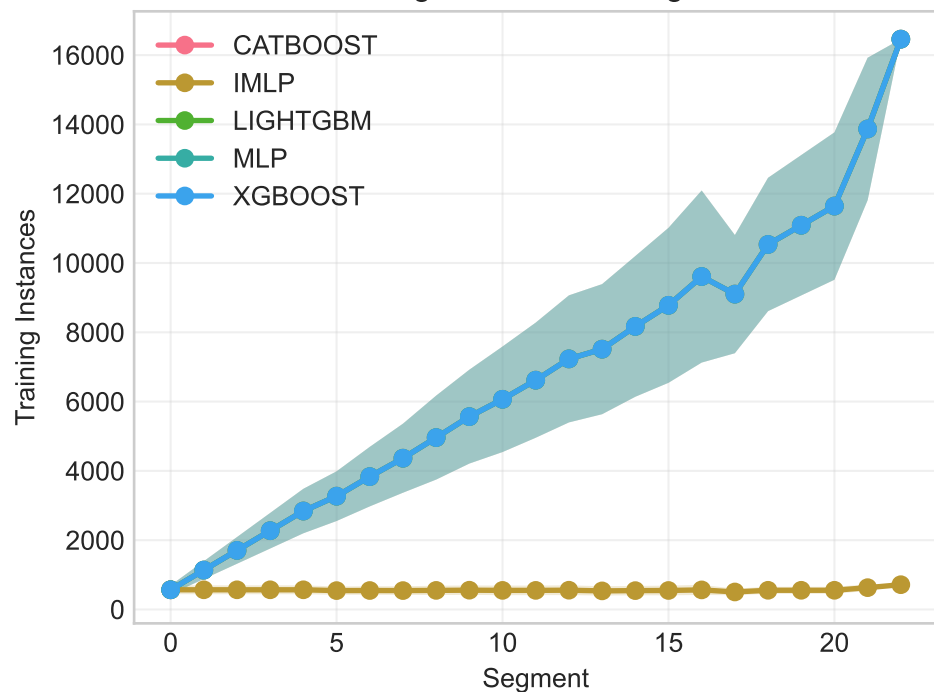

Training Time (s) vs Segment

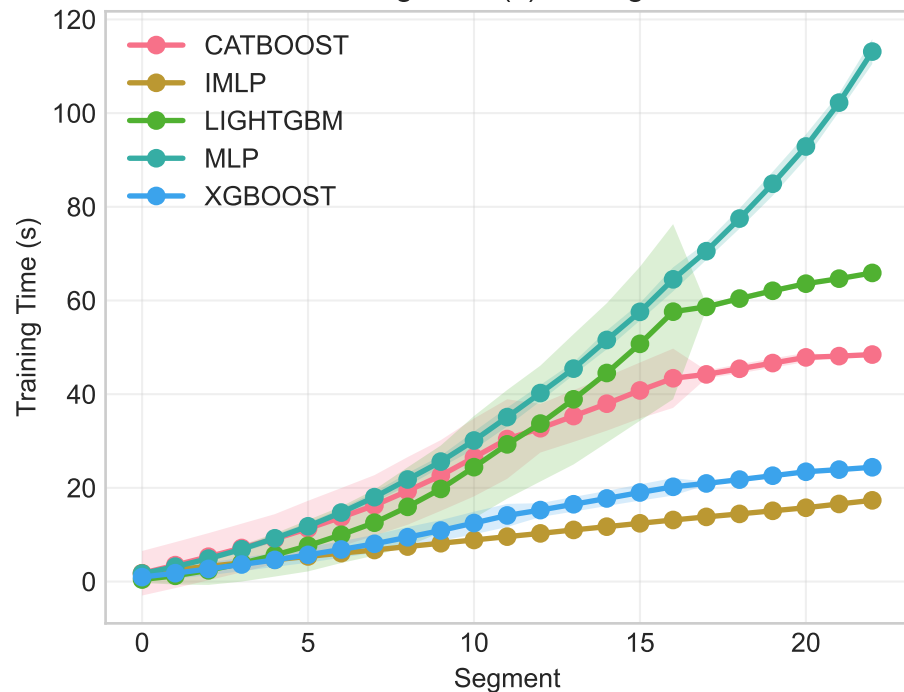

Supplement: supplementary_material [file segment_progression.pdf › plotting/figures/segment_progression.pdf]
