# Supplementary material
Source: ML conference proceedings conference paper supplement (https://openreview.net/forum?id=ijL7phwr5k)

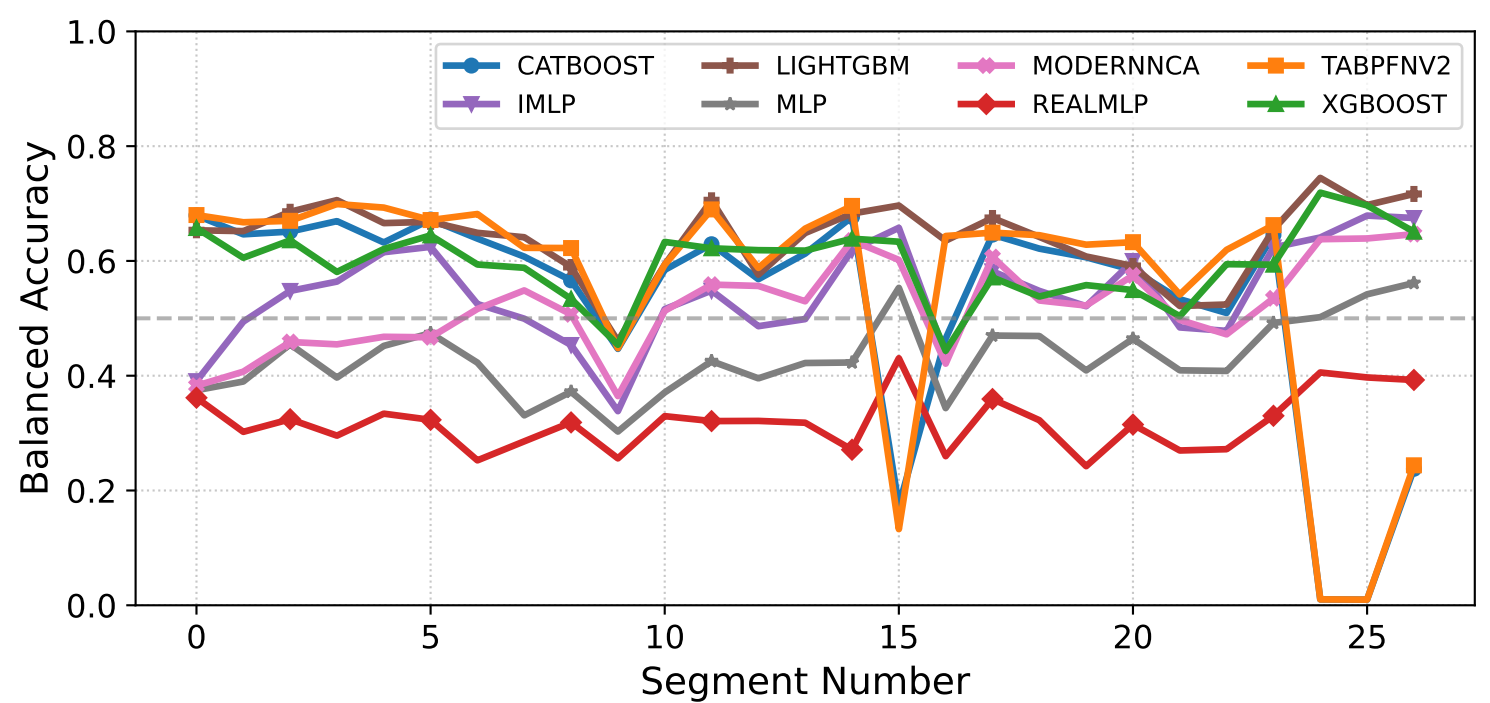

Supplement: supplementary_material [file 99901_accuracy_plot.pdf › baseline compared/notebooks/99901_accuracy_plot.pdf]

Total Energy (Joules)

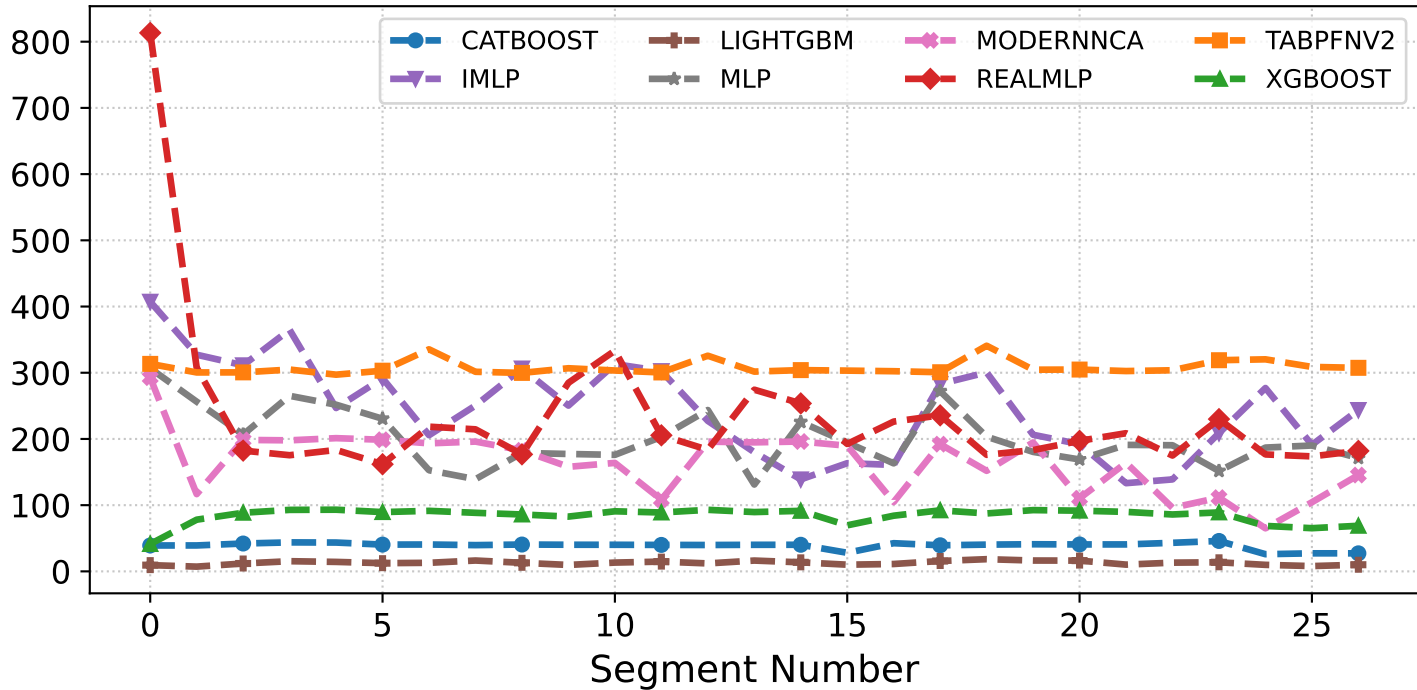

Supplement: supplementary_material [file 99901_energy_plot.pdf › baseline compared/notebooks/99901_energy_plot.pdf]

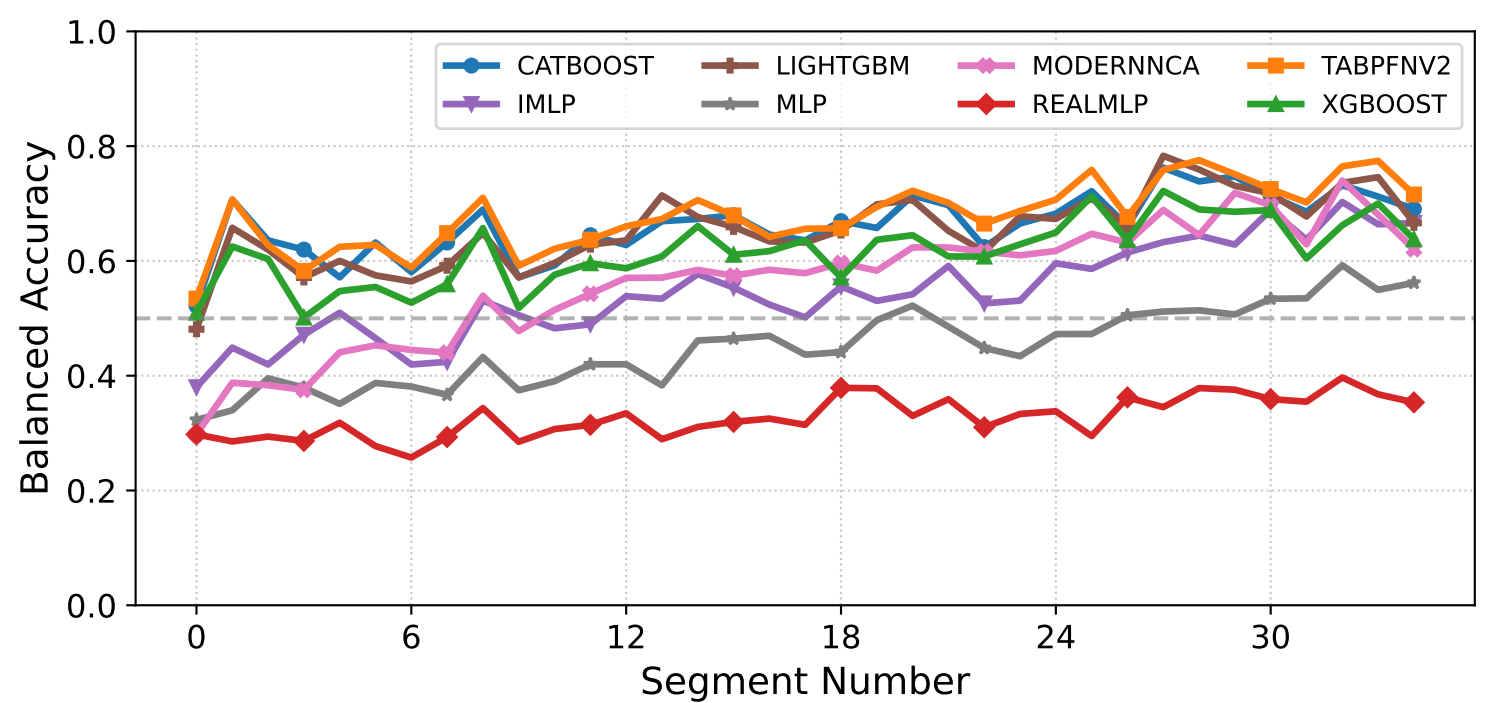

Supplement: supplementary_material [file 99902_accuracy_plot.pdf › baseline compared/notebooks/99902_accuracy_plot.pdf]

Total Energy (Joules)

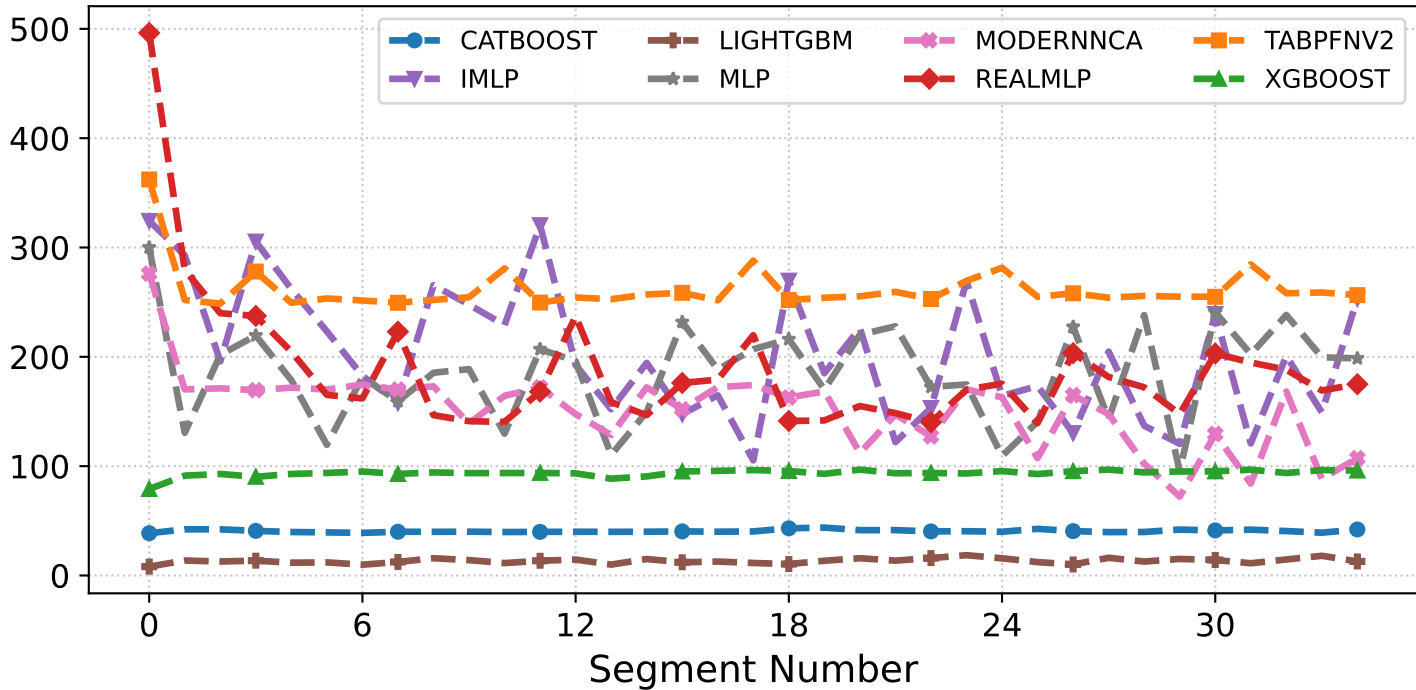

Supplement: supplementary_material [file 99902_energy_plot.pdf › baseline compared/notebooks/99902_energy_plot.pdf]

(A) Model Predictive Performance

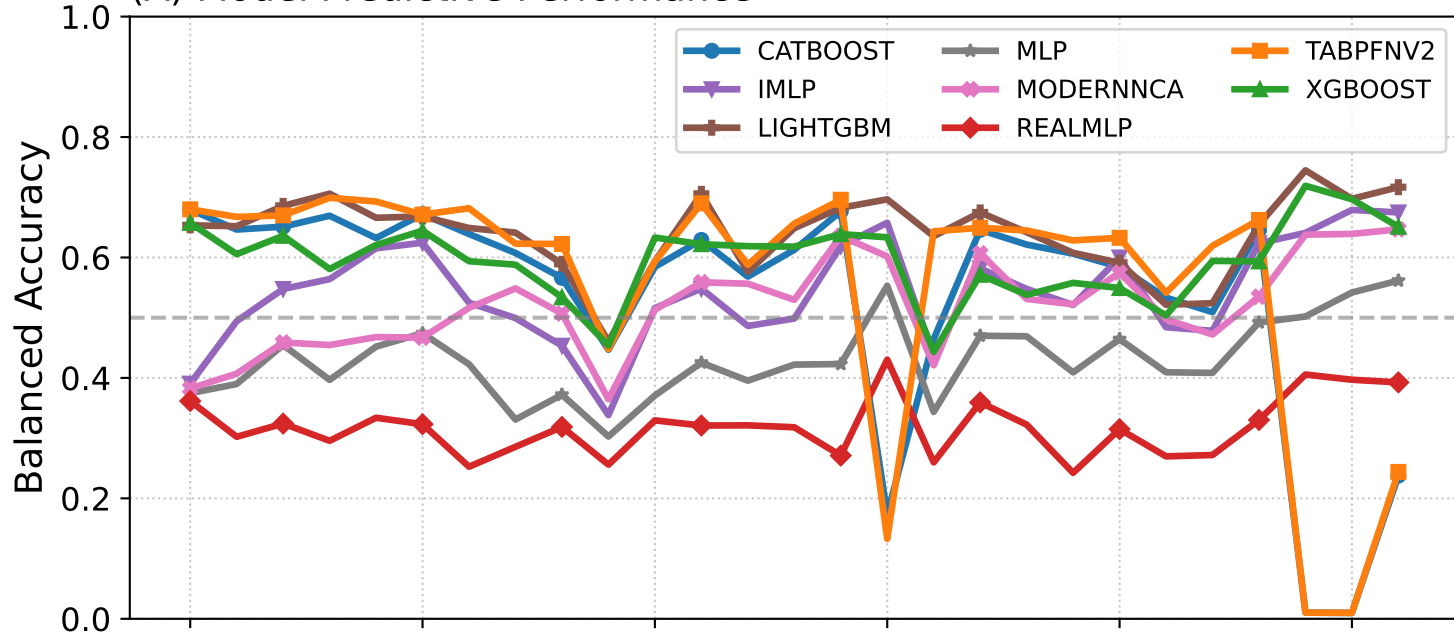

(B) Resource Consumption

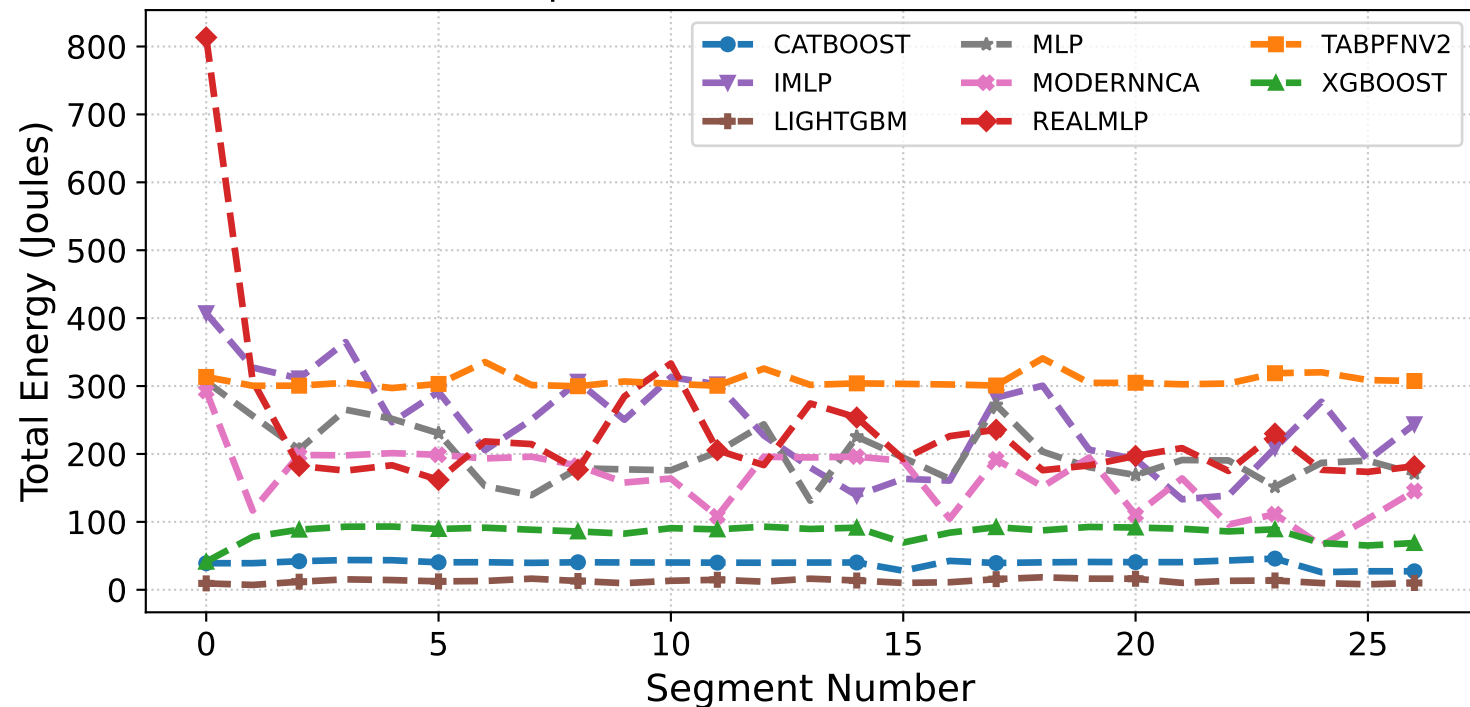

Supplement: supplementary_material [file scientific_comparison_plot.pdf › baseline compared/notebooks/scientific_comparison_plot.pdf]

# Final Balanced Acc

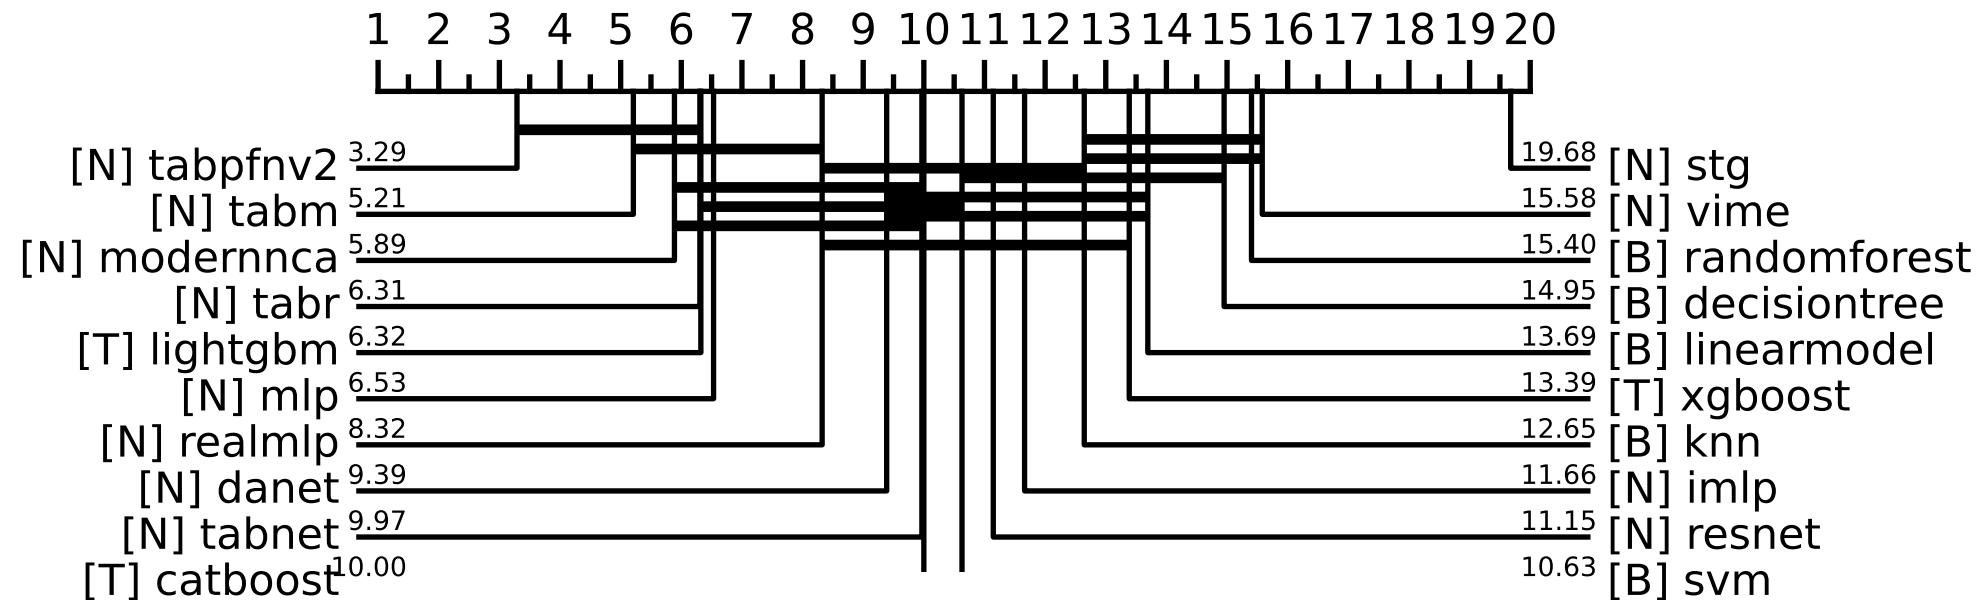

Supplement: supplementary_material [file Final_balanced_acc_cd_diagram.pdf › plotting/Final_balanced_acc_cd_diagram.pdf]

# Final Balanced Acc (Neural only)

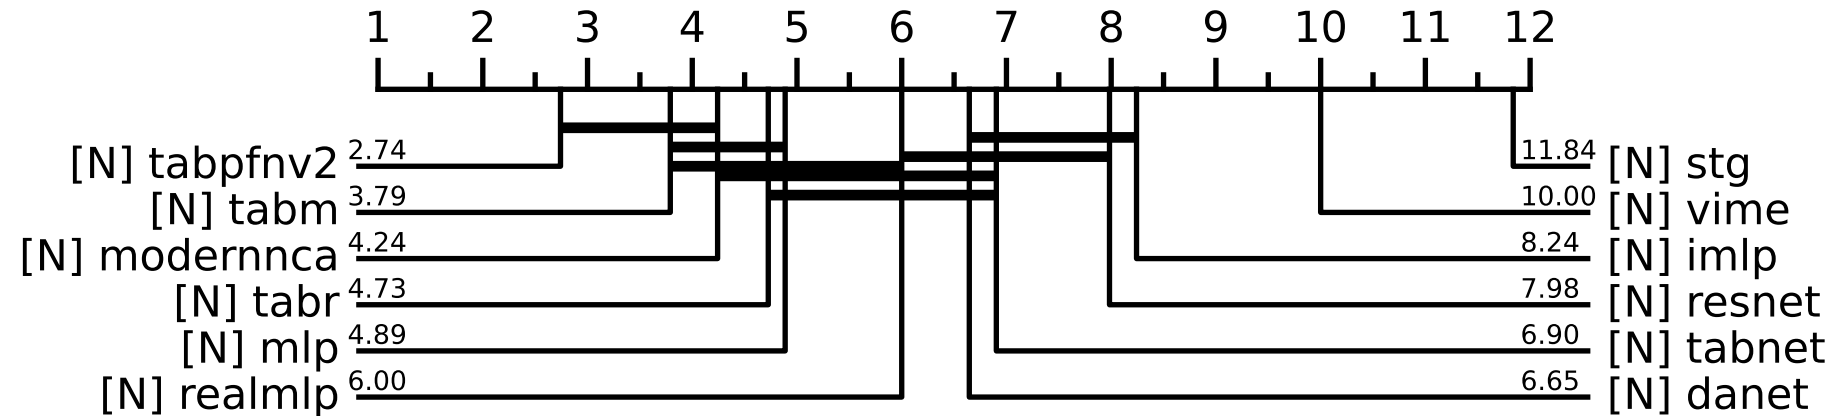

Supplement: supplementary_material [file Final_balanced_acc_cd_diagram_nn.pdf › plotting/Final_balanced_acc_cd_diagram_nn.pdf]

# Final Log Loss

1 2 3 4 5 6 7 8 9 10 11 12 13 14 15 16 17 18 19 20

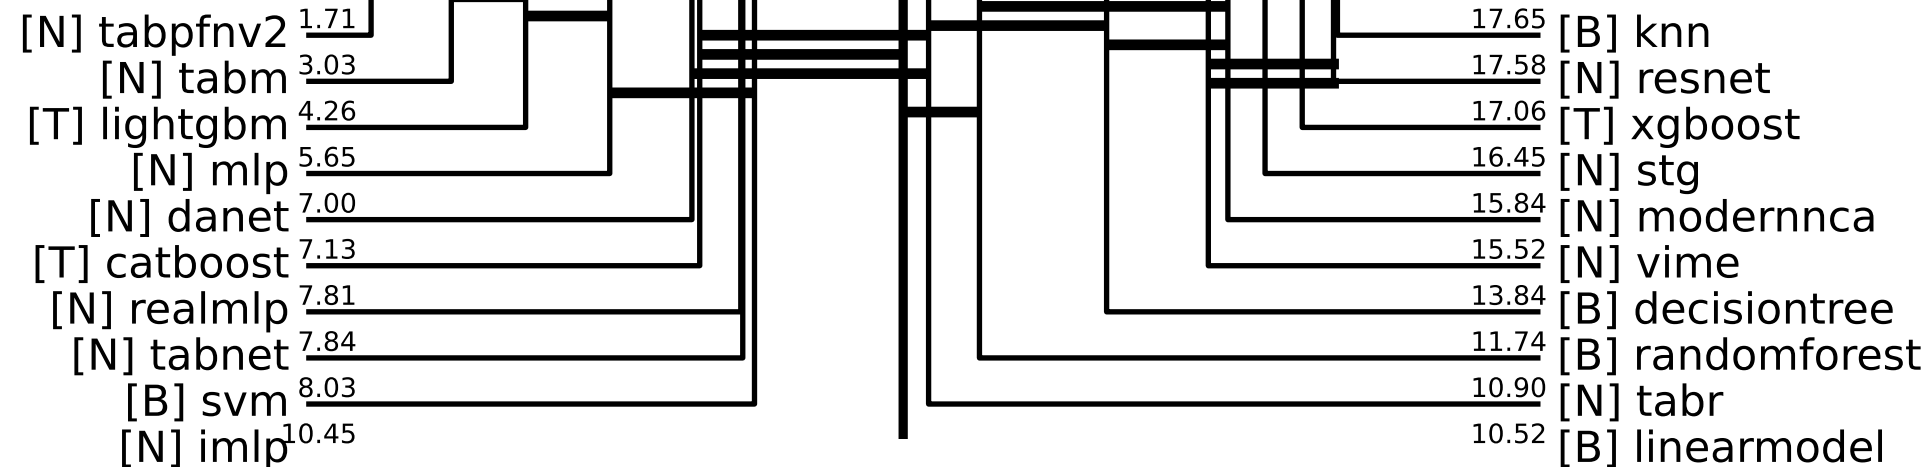

Supplement: supplementary_material [file Final_log_loss_cd_diagram.pdf › plotting/Final_log_loss_cd_diagram.pdf]

# Final Log Loss (Neural only)

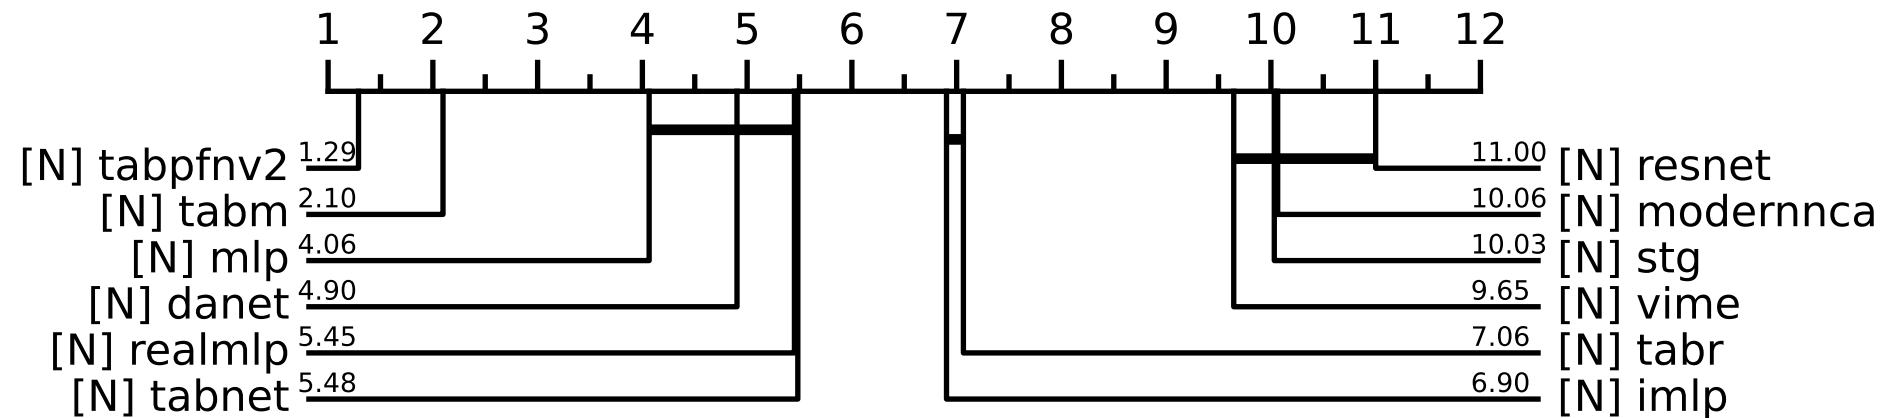

Supplement: supplementary_material [file Final_log_loss_cd_diagram_nn.pdf › plotting/Final_log_loss_cd_diagram_nn.pdf]

# Netscore-T Balanced

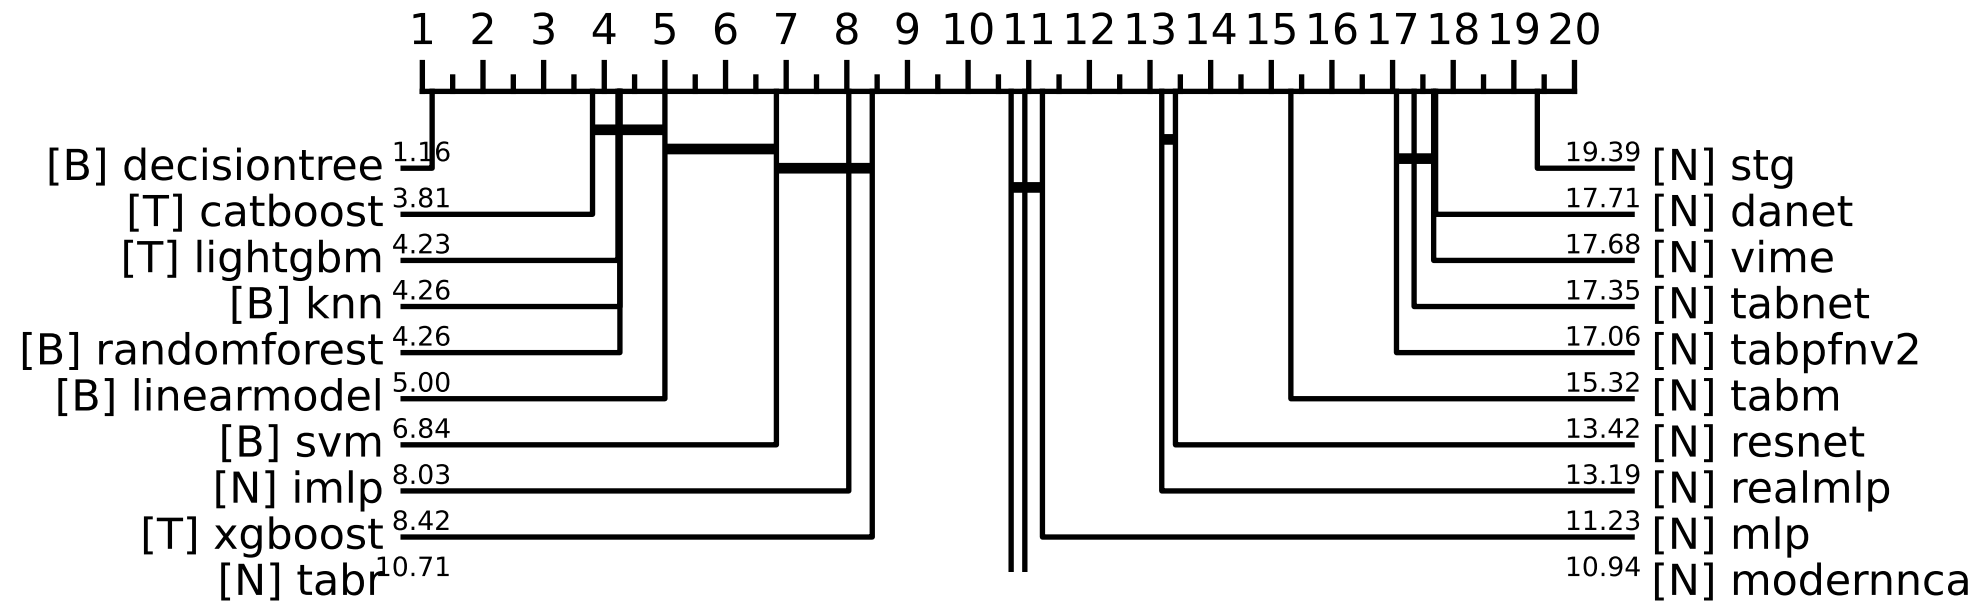

Supplement: supplementary_material [file NetScore-T_balanced_cd_diagram.pdf › plotting/NetScore-T_balanced_cd_diagram.pdf]

# Netscore-T Balanced (Neural only)

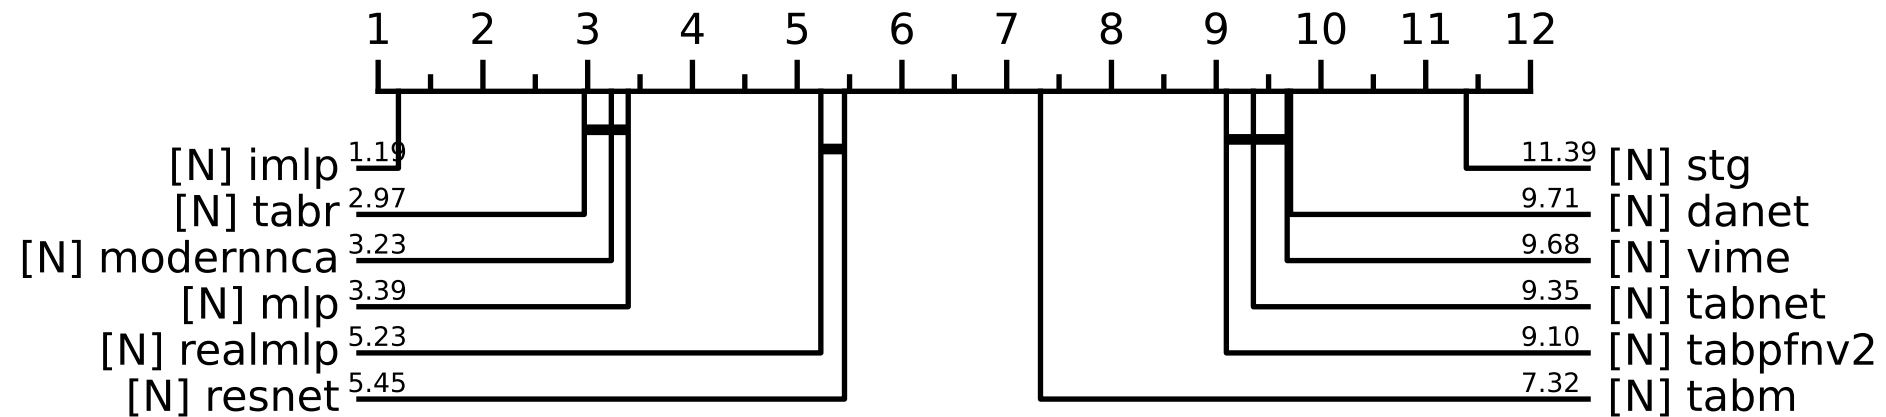

Supplement: supplementary_material [file NetScore-T_balanced_cd_diagram_nn.pdf › plotting/NetScore-T_balanced_cd_diagram_nn.pdf]

# Netscore-T Logloss

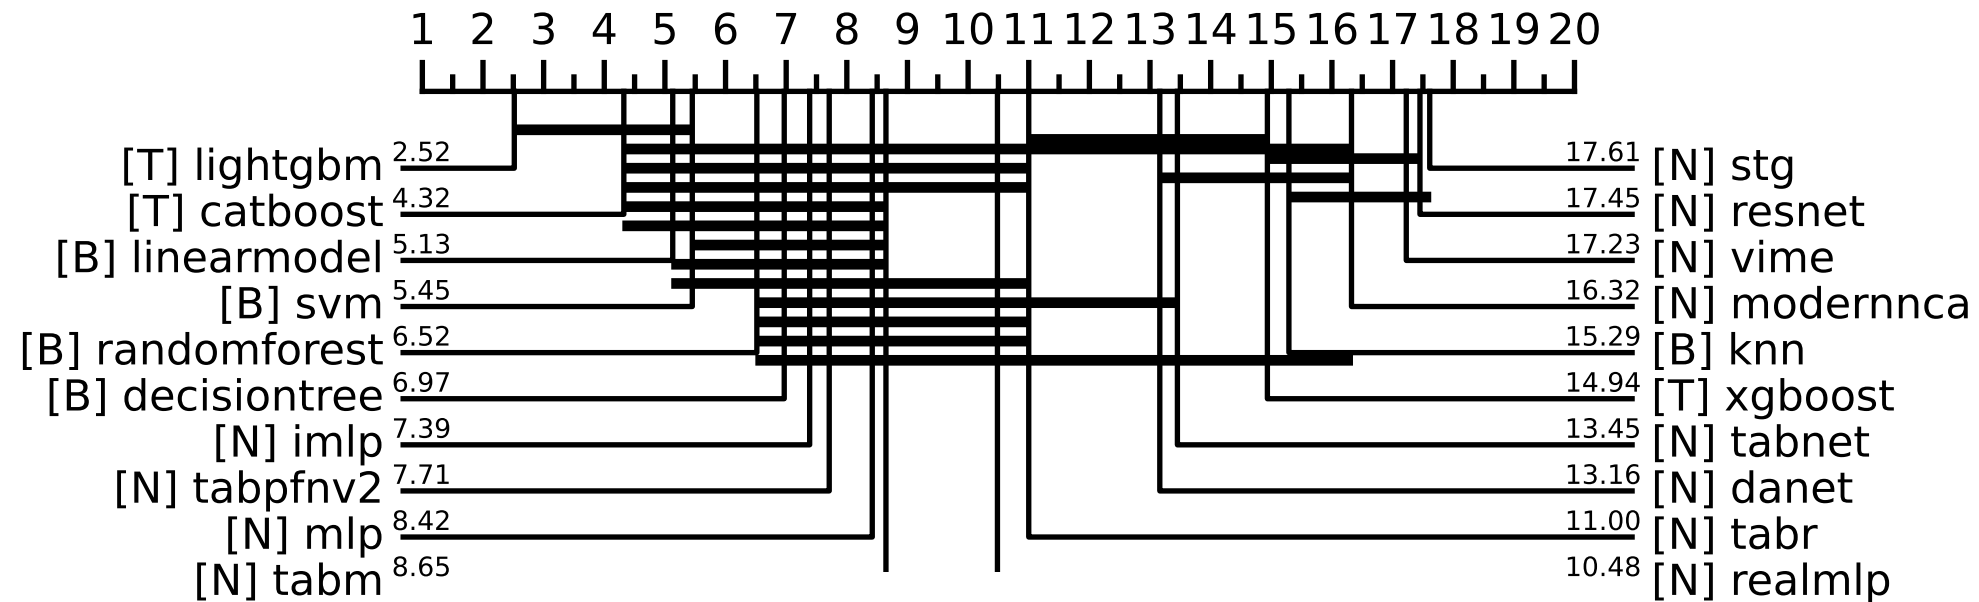

Supplement: supplementary_material [file NetScore-T_logloss_cd_diagram.pdf › plotting/NetScore-T_logloss_cd_diagram.pdf]

# Netscore-T Logloss (Neural only)

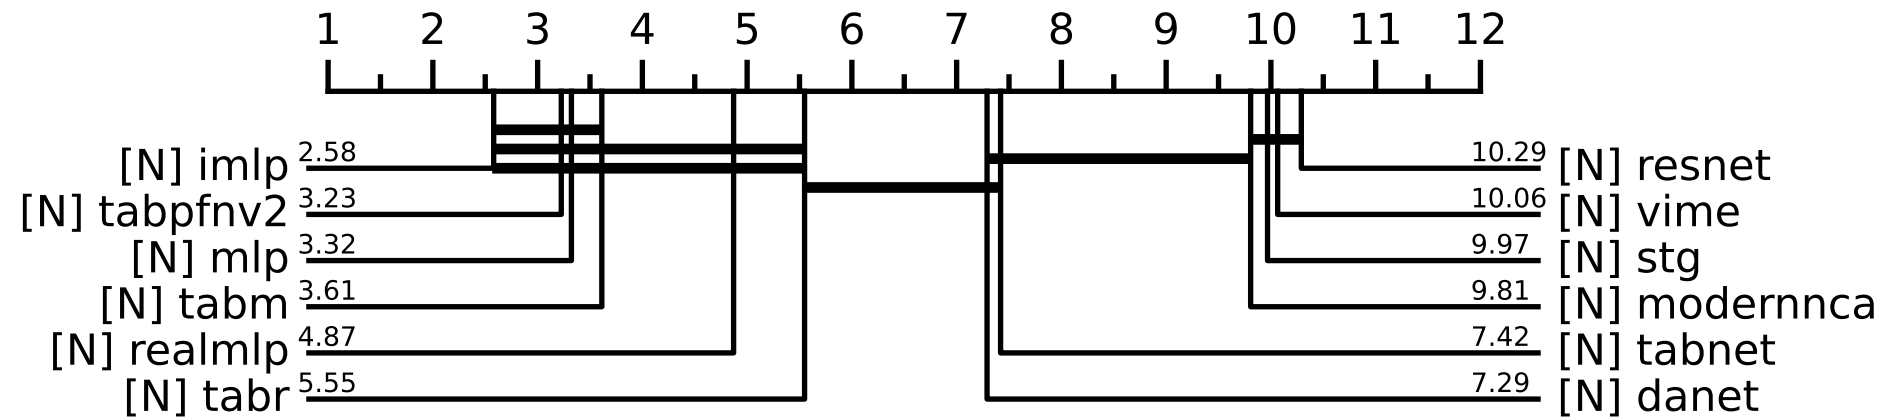

Supplement: supplementary_material [file NetScore-T_logloss_cd_diagram_nn.pdf › plotting/NetScore-T_logloss_cd_diagram_nn.pdf]

# Total Energy Joules

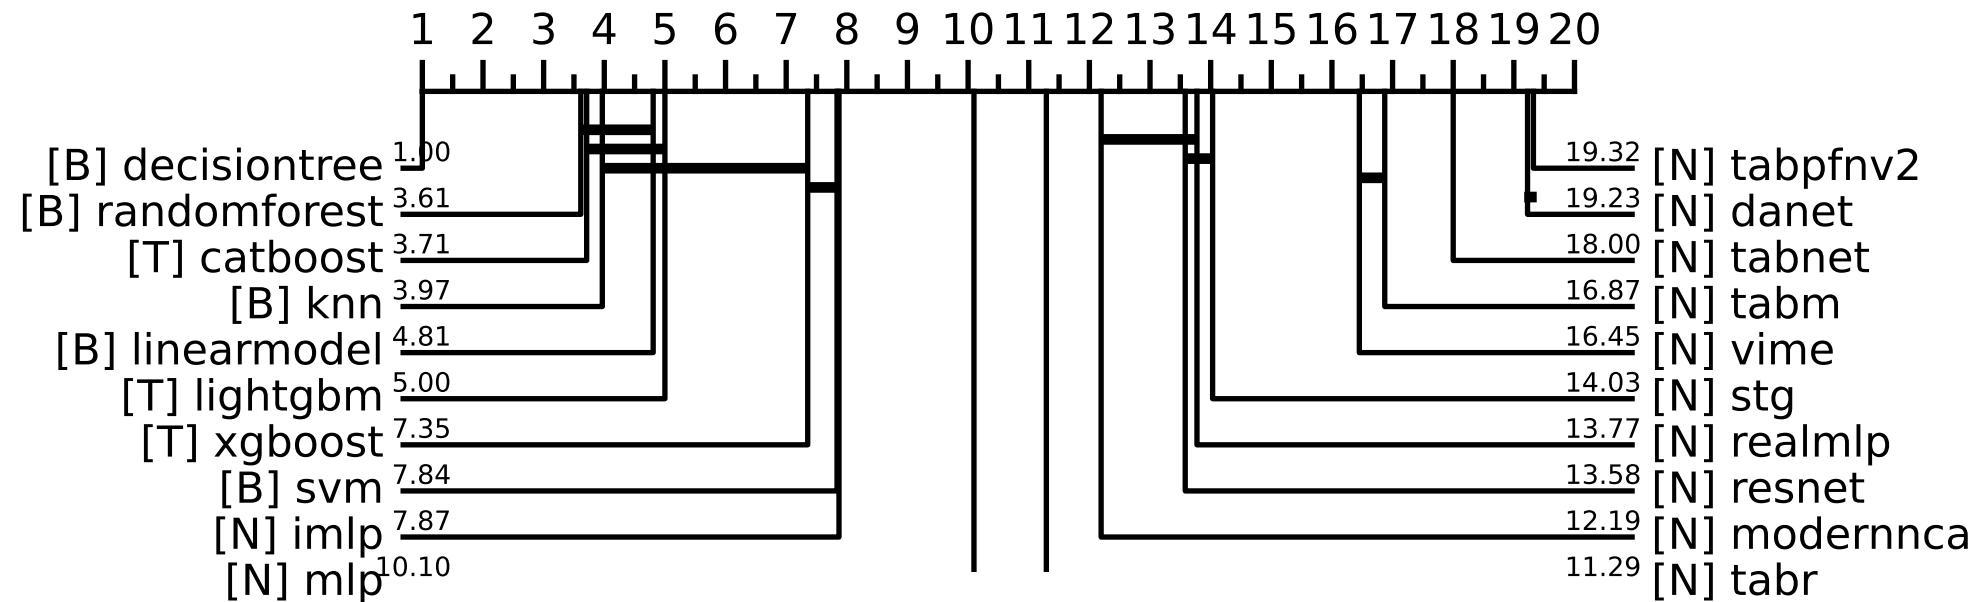

Supplement: supplementary_material [file Total_energy_joules_cd_diagram.pdf › plotting/Total_energy_joules_cd_diagram.pdf]

# Total Energy Joules (Neural only)

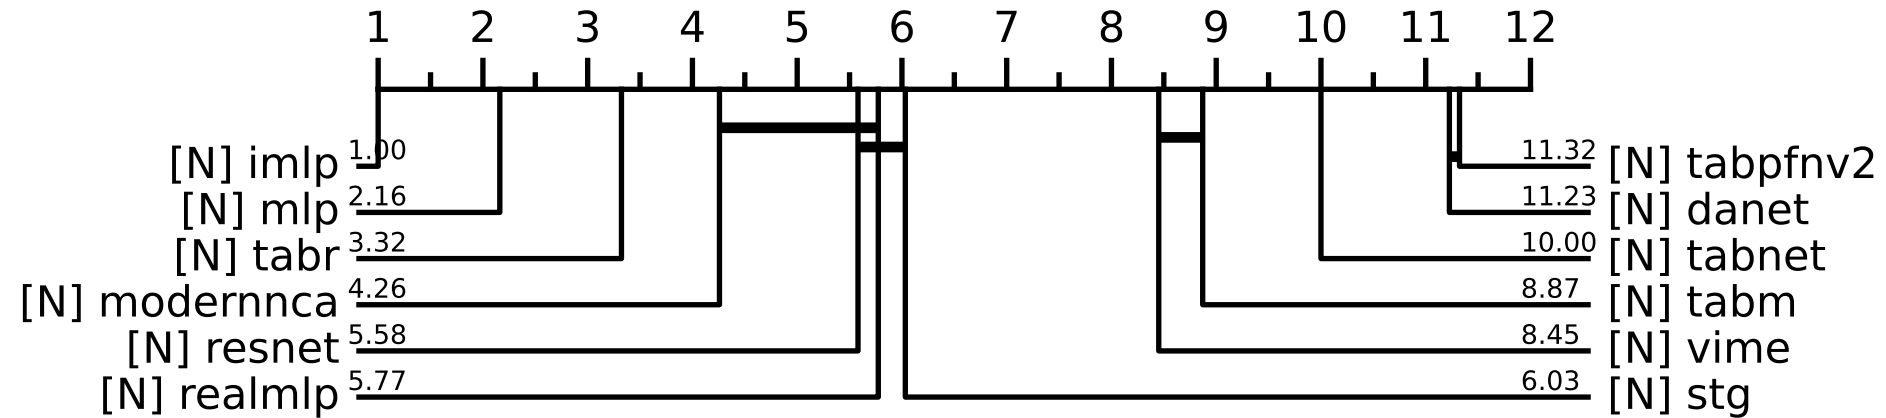

Supplement: supplementary_material [file Total_energy_joules_cd_diagram_nn.pdf › plotting/Total_energy_joules_cd_diagram_nn.pdf]

# Total Time Seconds

1 2 3 4 5 6 7 8 9 10 11 12 13 14 15 16 17 18 19 20

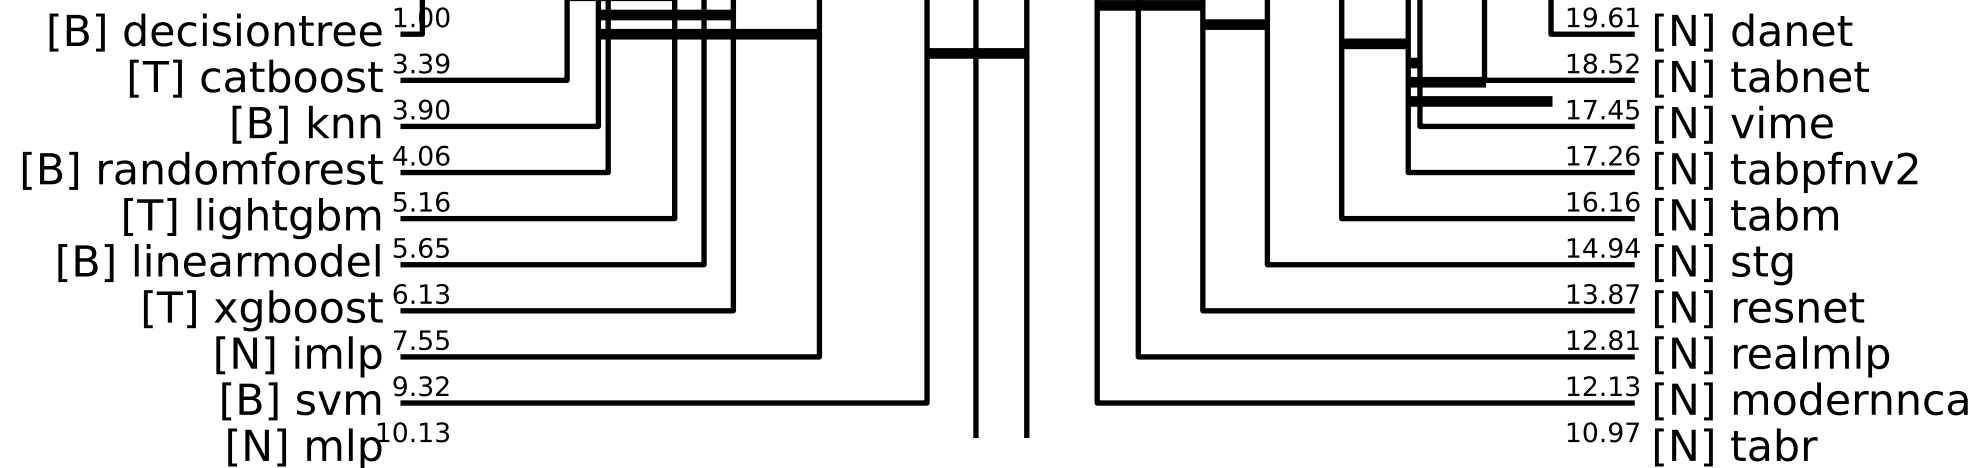

Supplement: supplementary_material [file Total_time_seconds_cd_diagram.pdf › plotting/Total_time_seconds_cd_diagram.pdf]

# Total Time Seconds (Neural only)

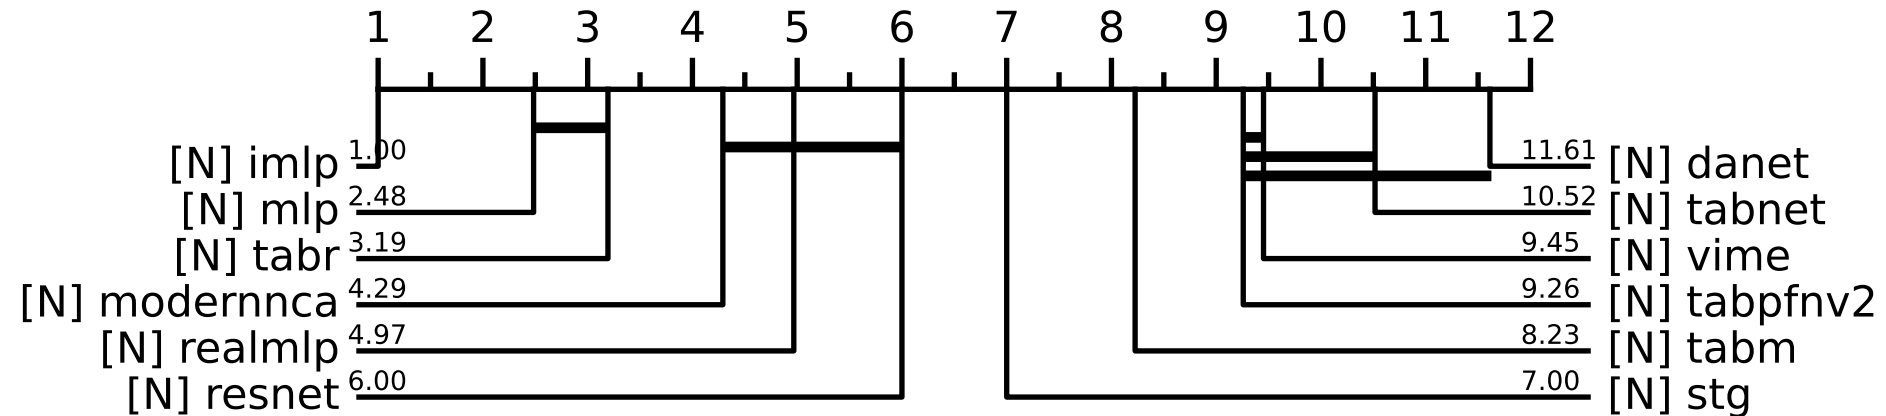

Supplement: supplementary_material [file Total_time_seconds_cd_diagram_nn.pdf › plotting/Total_time_seconds_cd_diagram_nn.pdf]

# Energy Efficiency: IMLP vs MLP

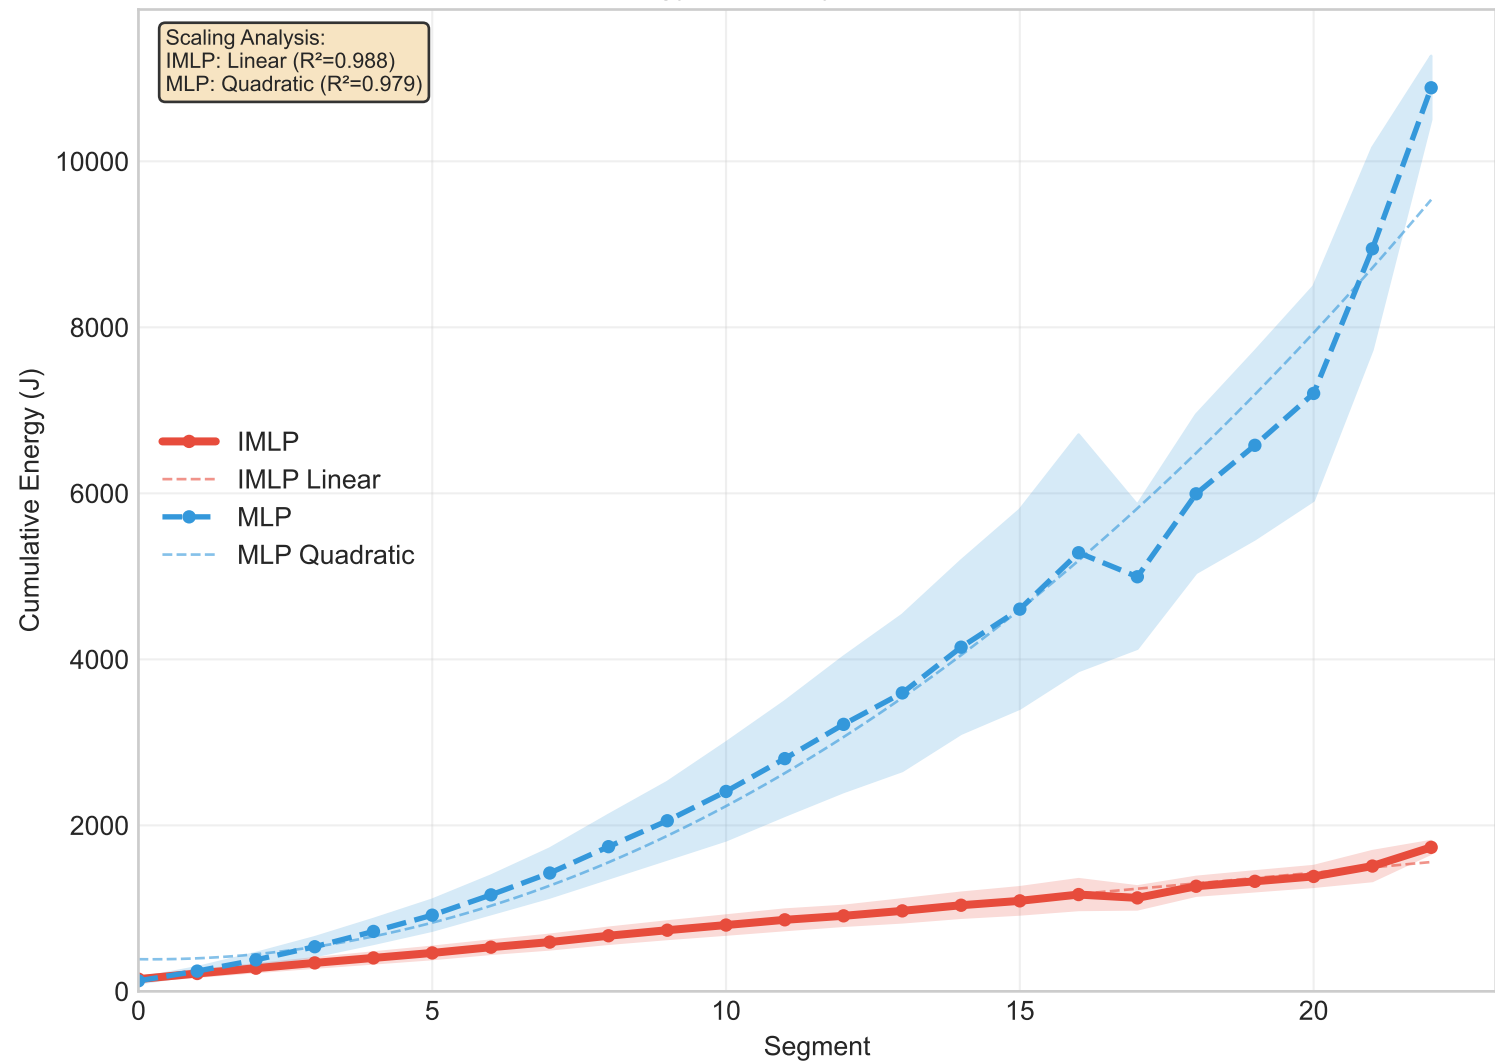

Supplement: supplementary_material [file efficiency_comparison.pdf › plotting/appendix_figures/efficiency_comparison.pdf]

Balanced Accuracy vs Segment

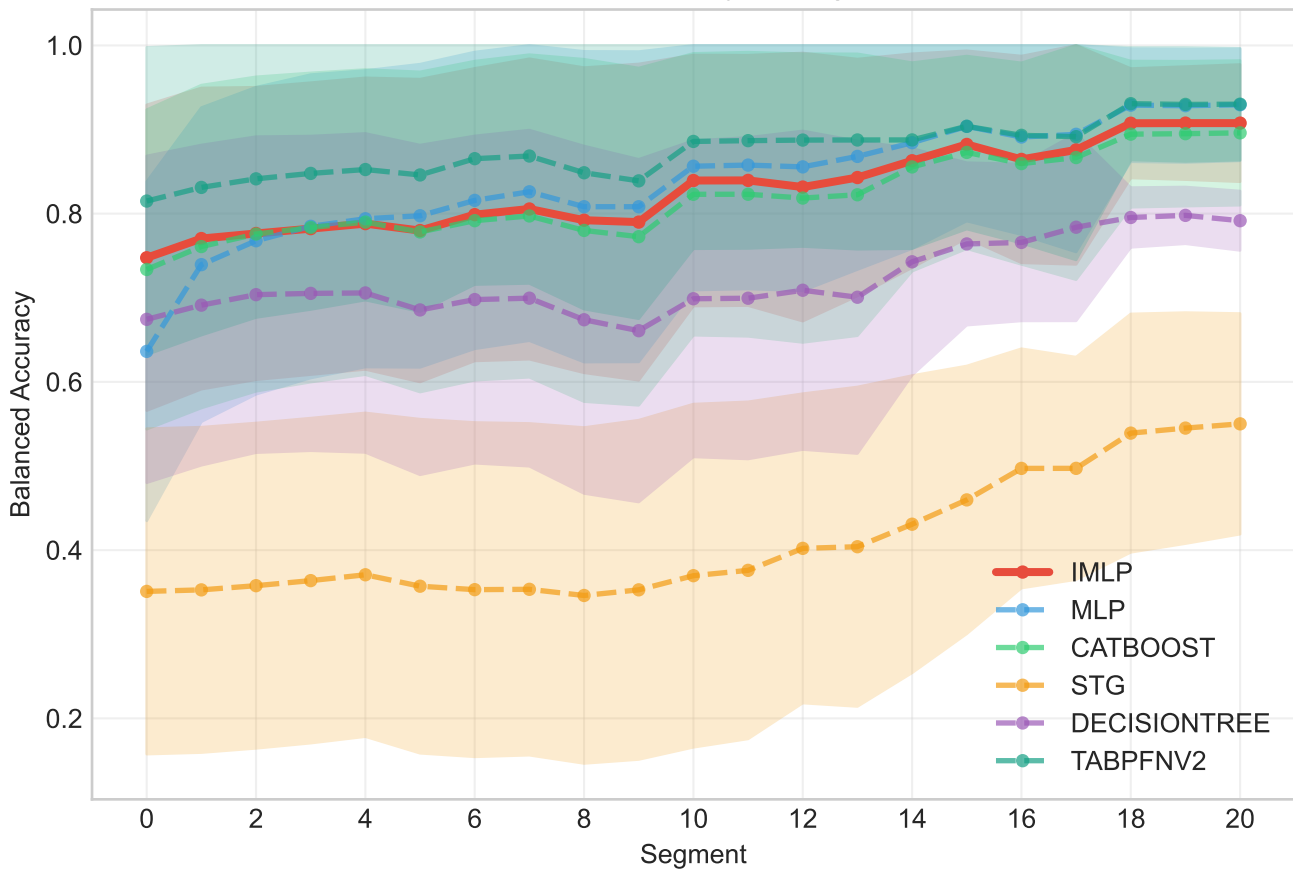

Supplement: supplementary_material [file learning_curve_balanced_accuracy.pdf › plotting/appendix_figures/learning_curve_balanced_accuracy.pdf]

Log-Loss vs Segment

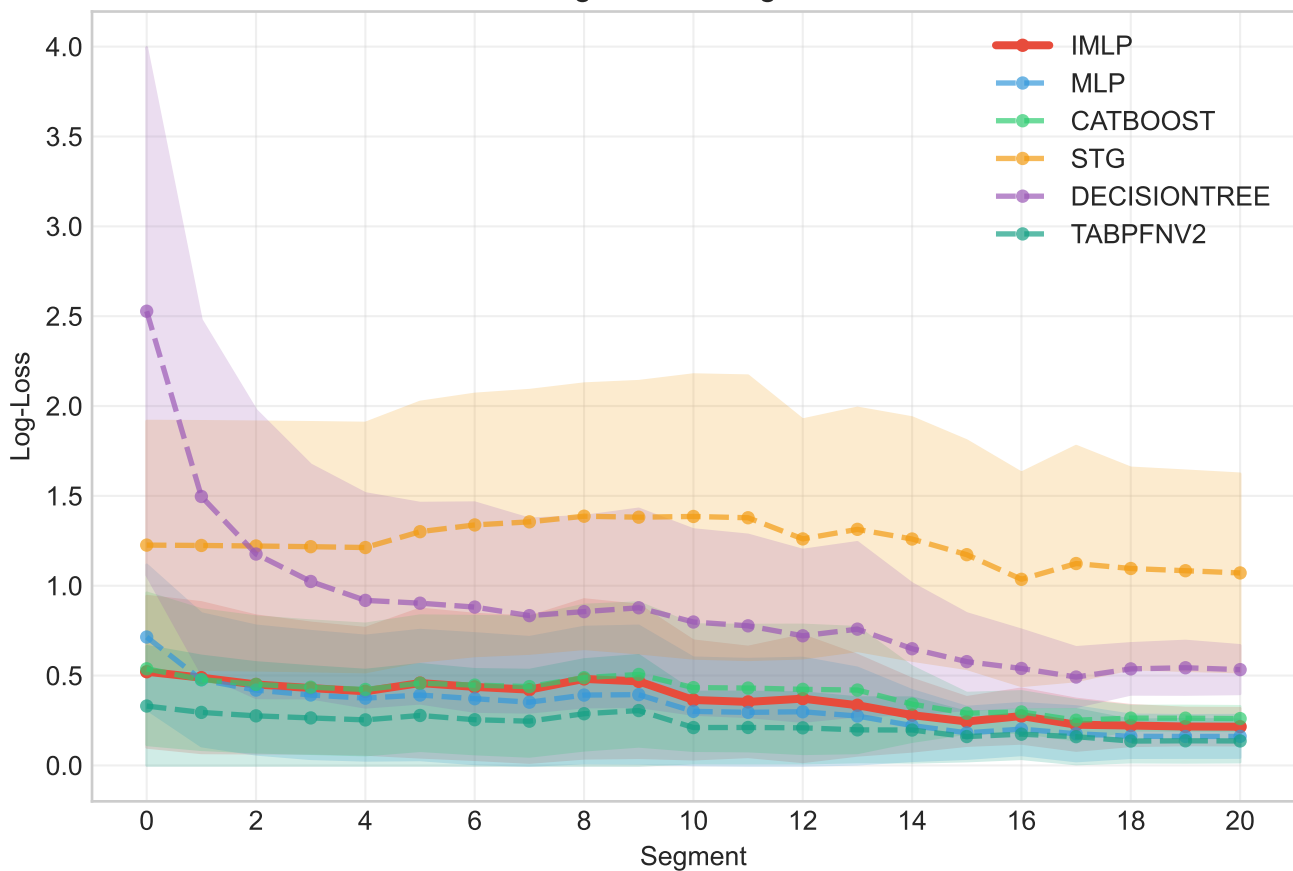

Supplement: supplementary_material [file learning_curve_log_loss.pdf › plotting/appendix_figures/learning_curve_log_loss.pdf]

# Energy (J) vs Segment

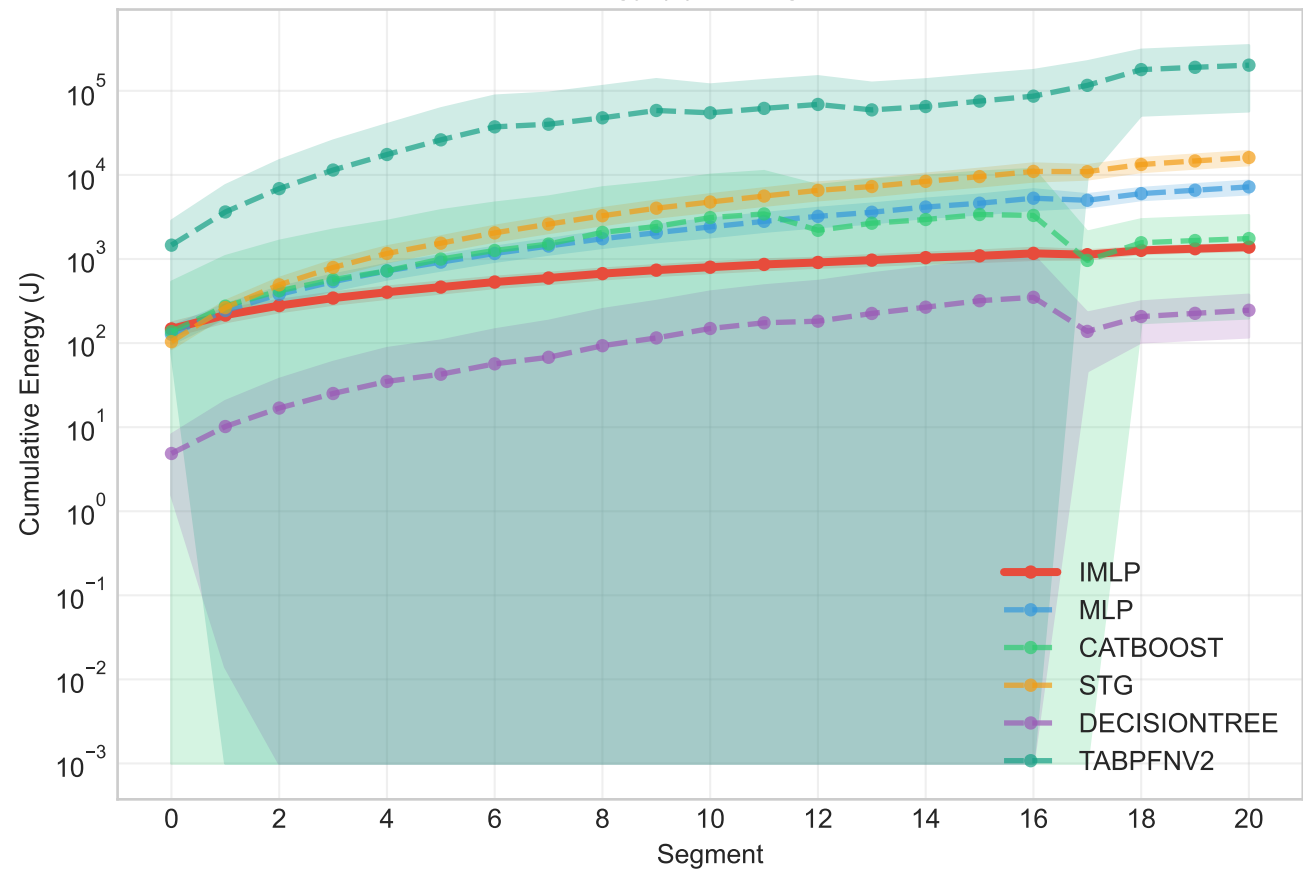

Supplement: supplementary_material [file learning_curve_total_energy_joules.pdf › plotting/appendix_figures/learning_curve_total_energy_joules.pdf]

Time (s) vs Segment

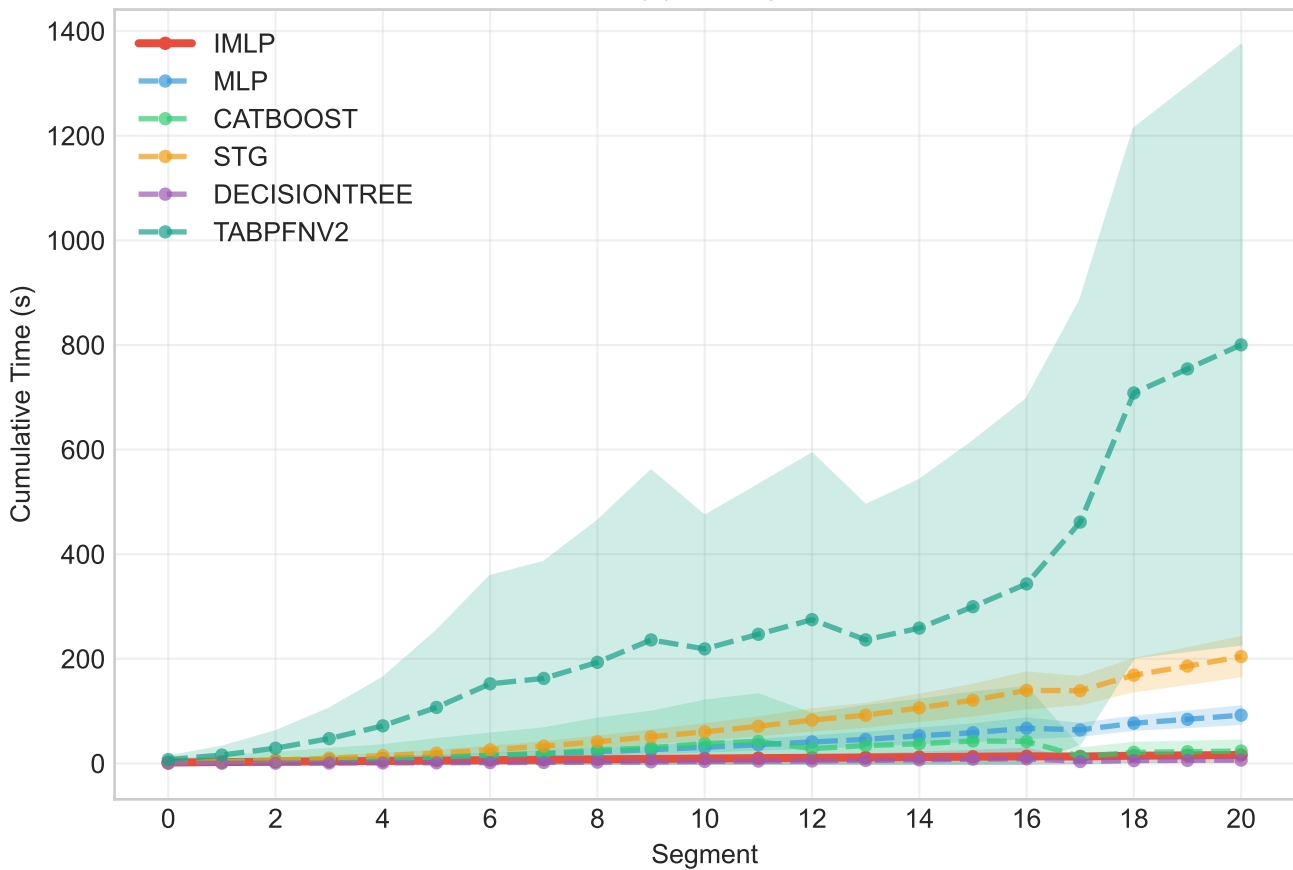

Supplement: supplementary_material [file learning_curve_total_time_seconds.pdf › plotting/appendix_figures/learning_curve_total_time_seconds.pdf]

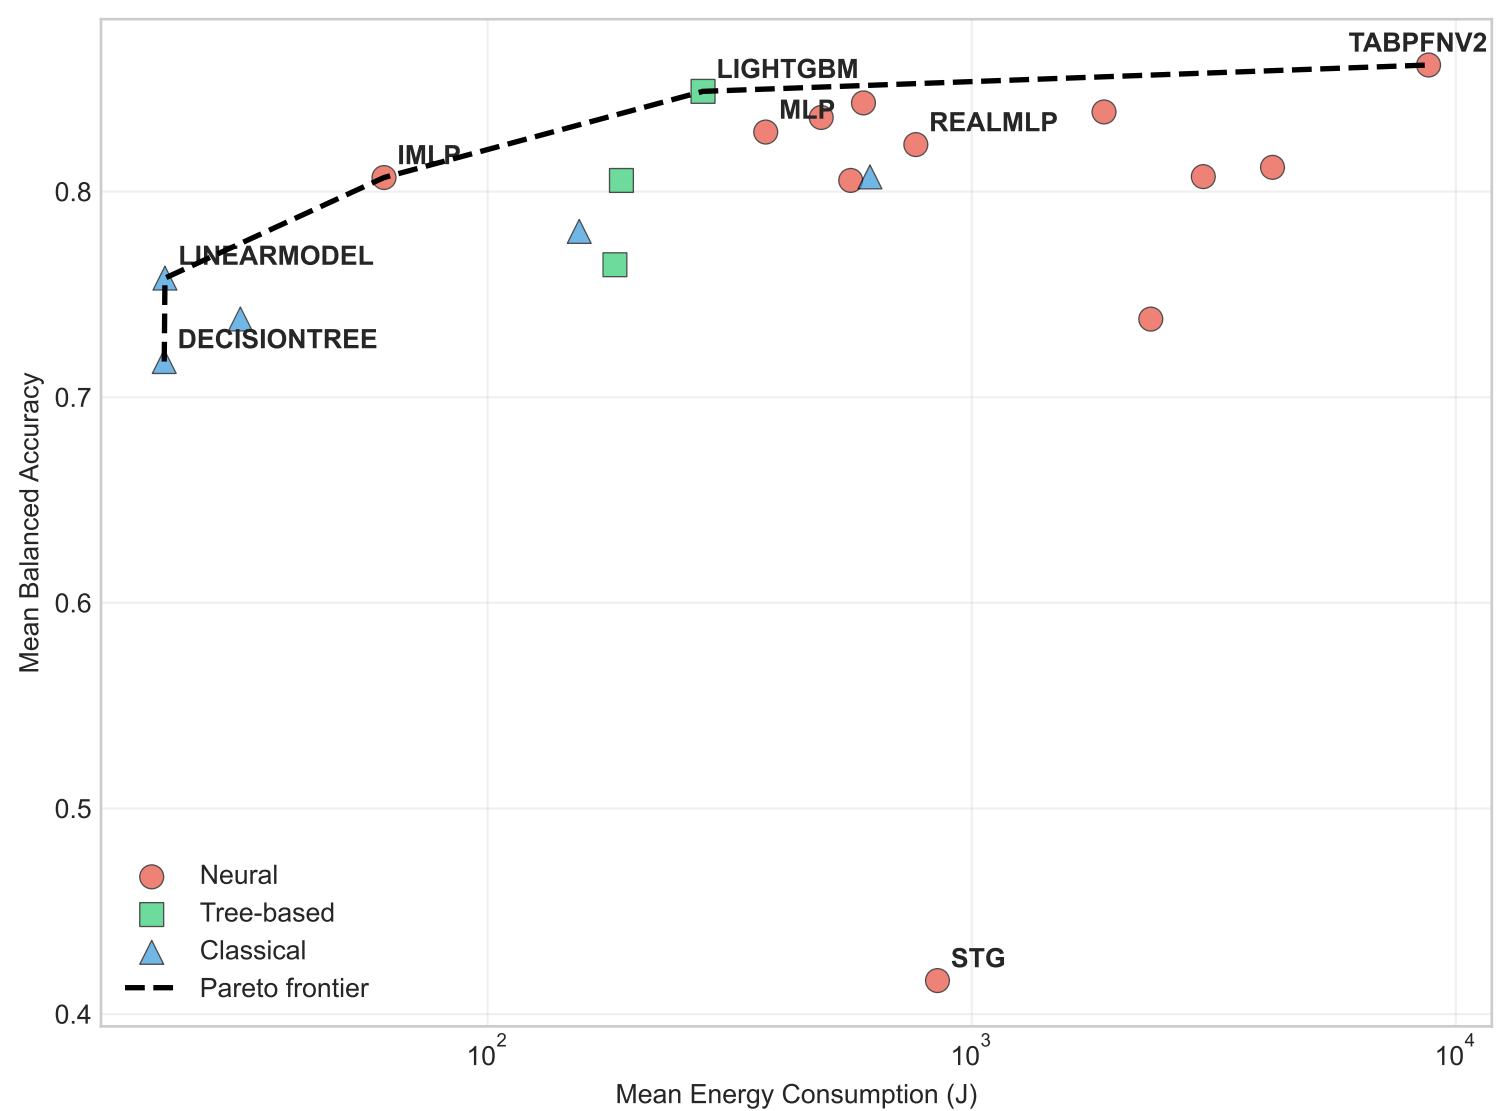

Supplement: supplementary_material [file pareto_frontier.pdf › plotting/appendix_figures/pareto_frontier.pdf]

Balanced Accuracy Direction vs Segment (per-run y-axis aligned)

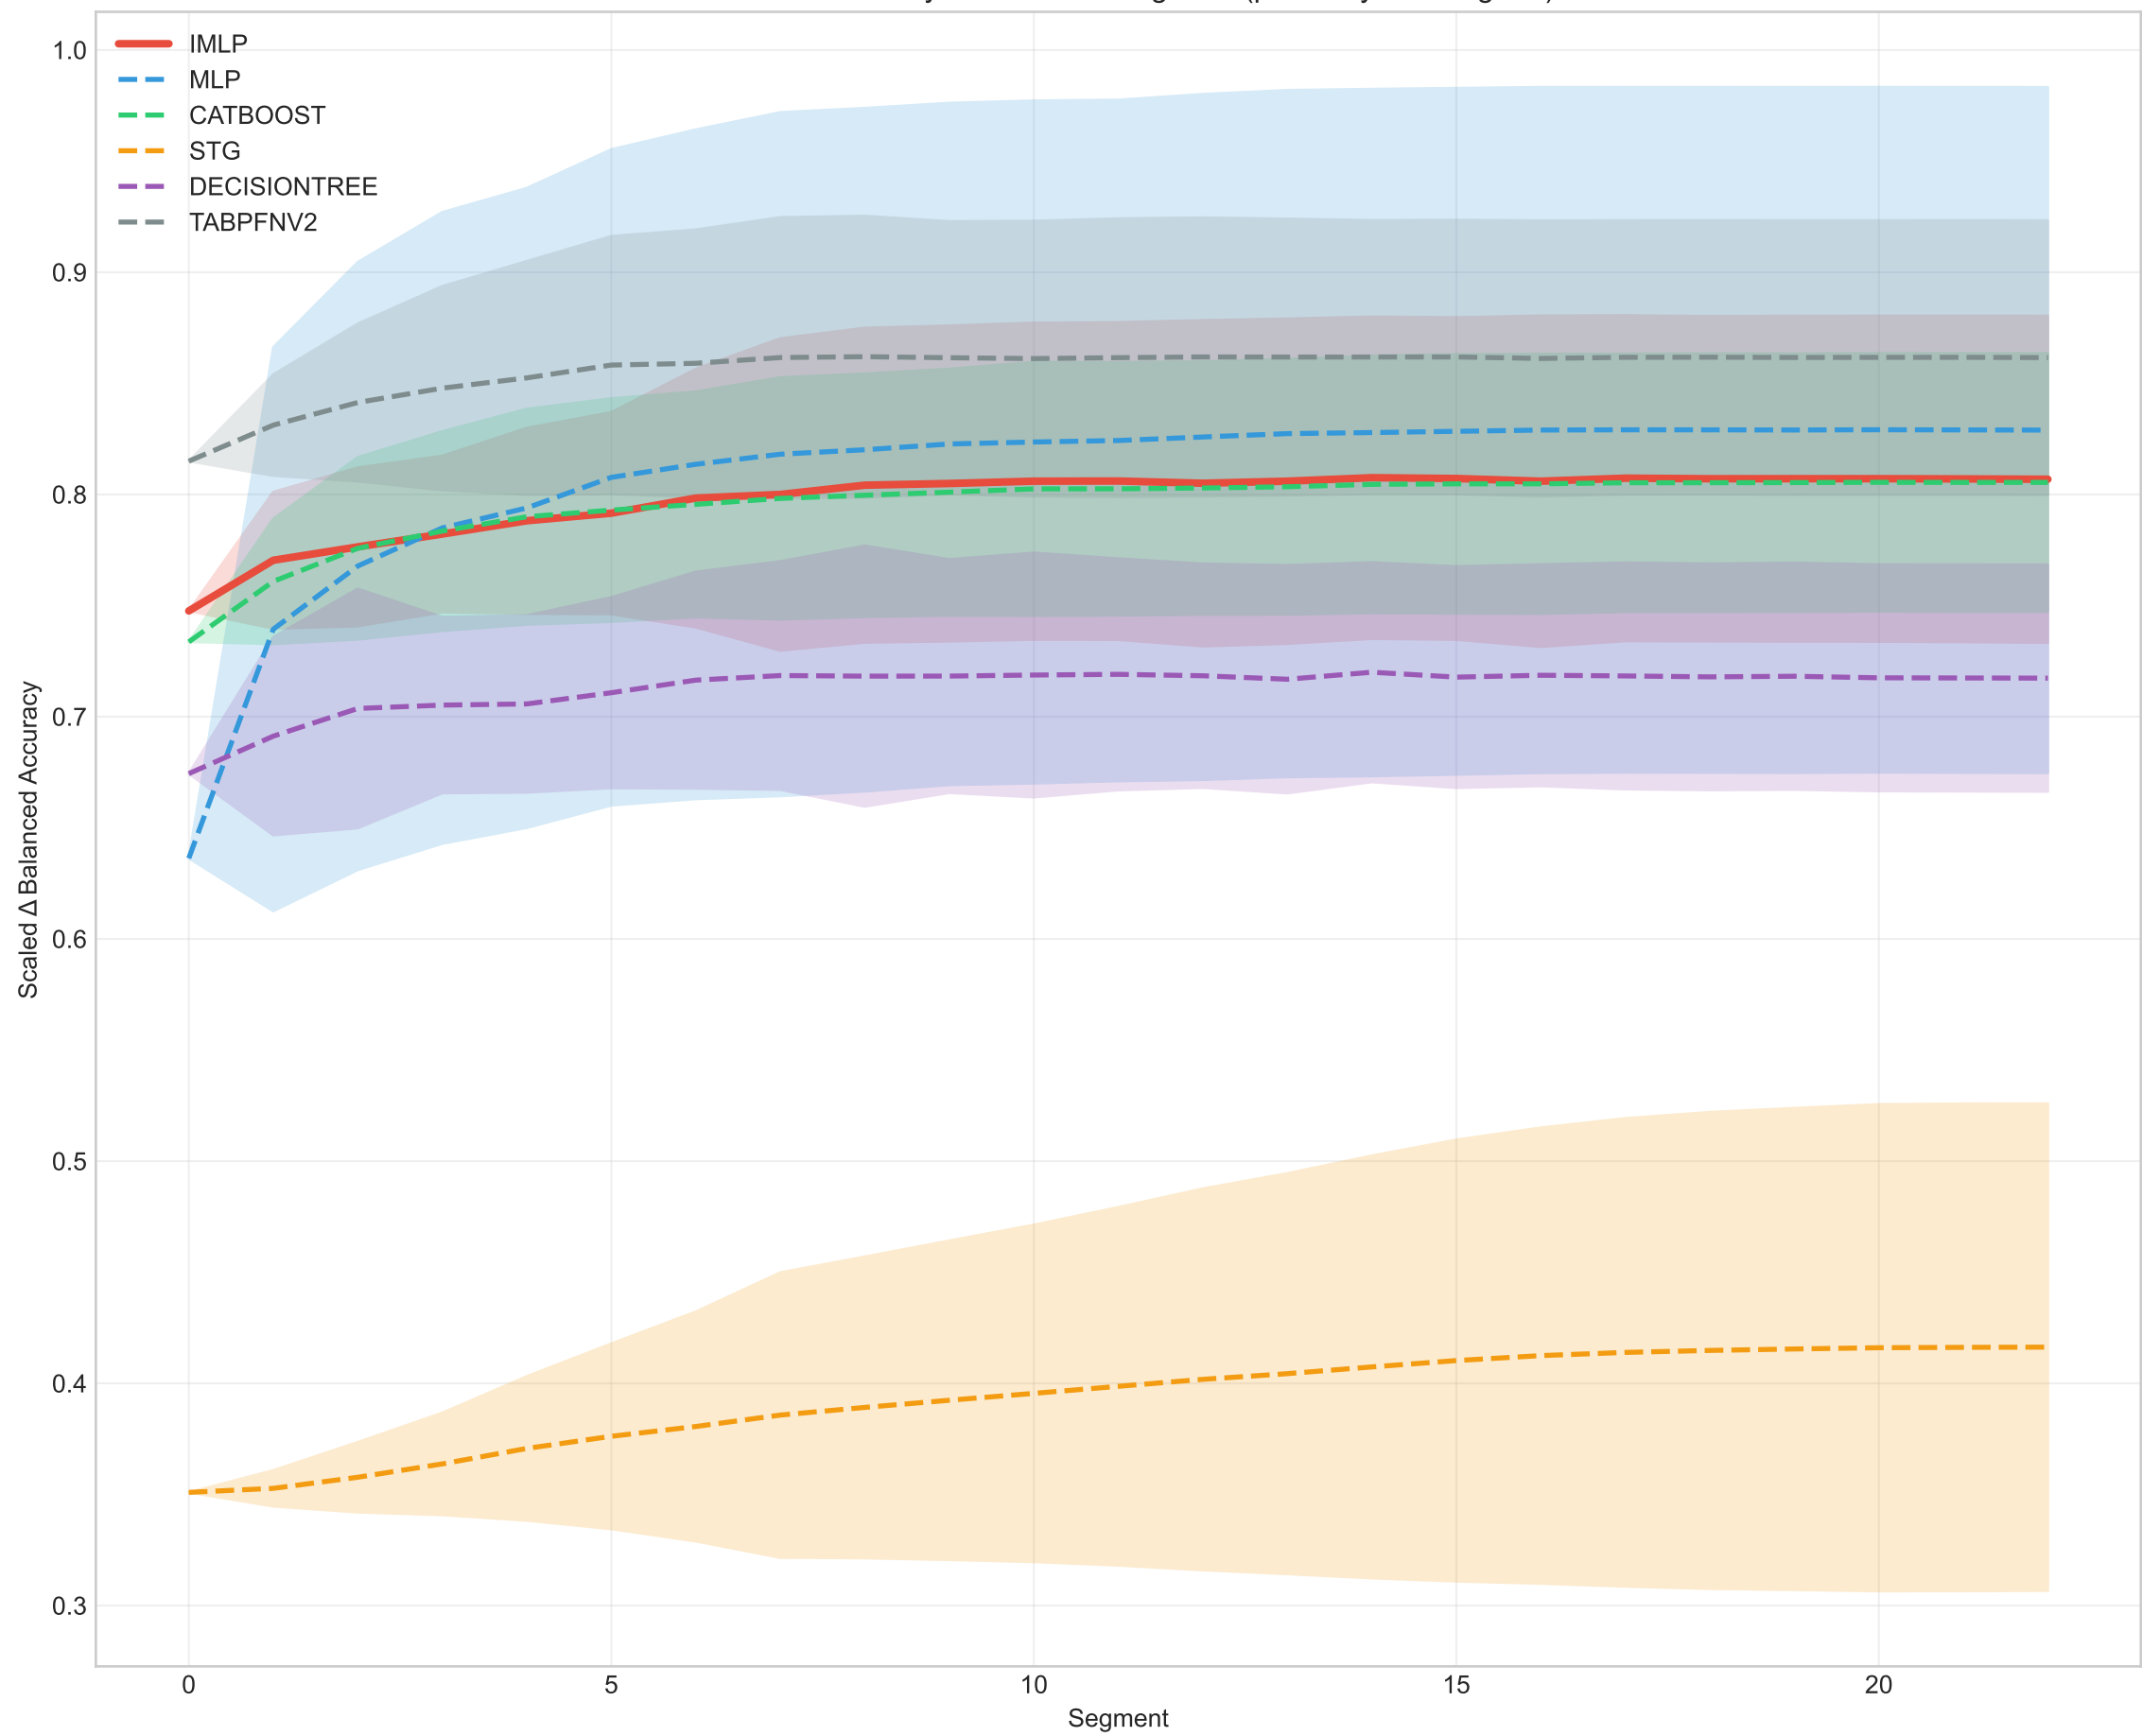

Supplement: supplementary_material [file balacc_direction.pdf › plotting/figures/balacc_direction.pdf]

Balanced Accuracy Extrapolated Trend vs Segment

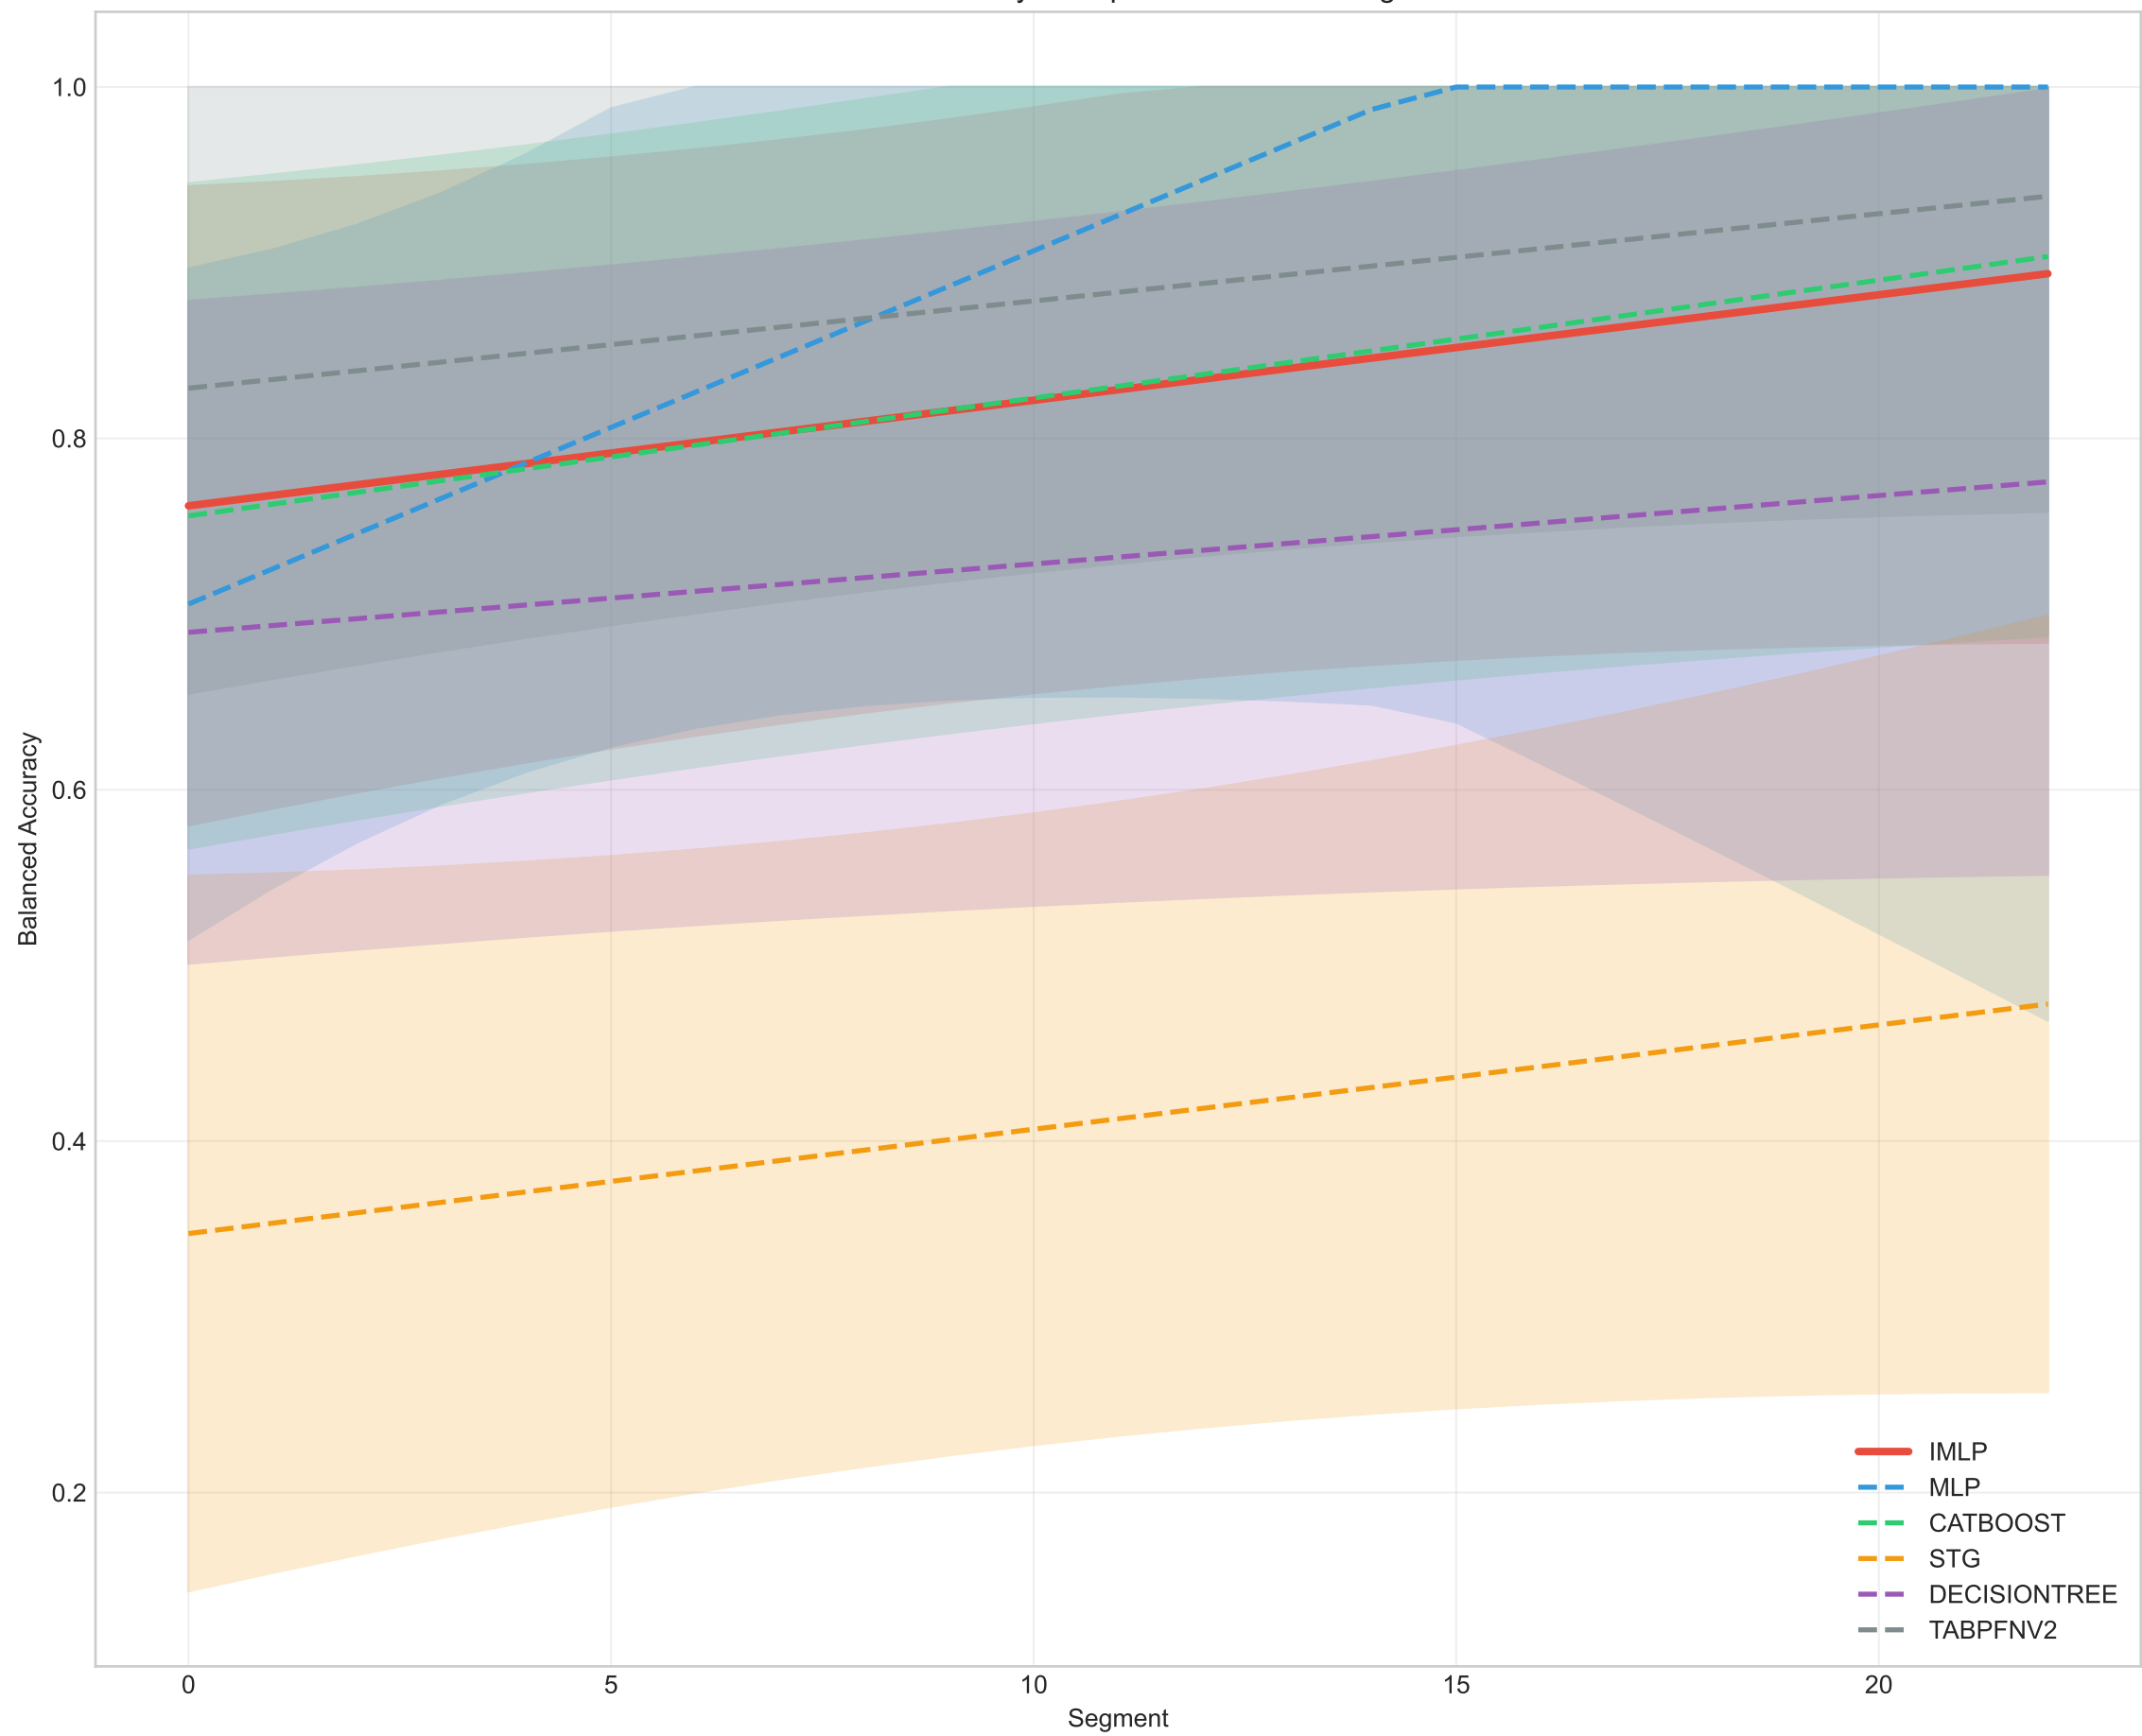

Supplement: supplementary_material [file balacc_extrapolated_trend.pdf › plotting/figures/balacc_extrapolated_trend.pdf]

Balanced Accuracy Trend vs Segment

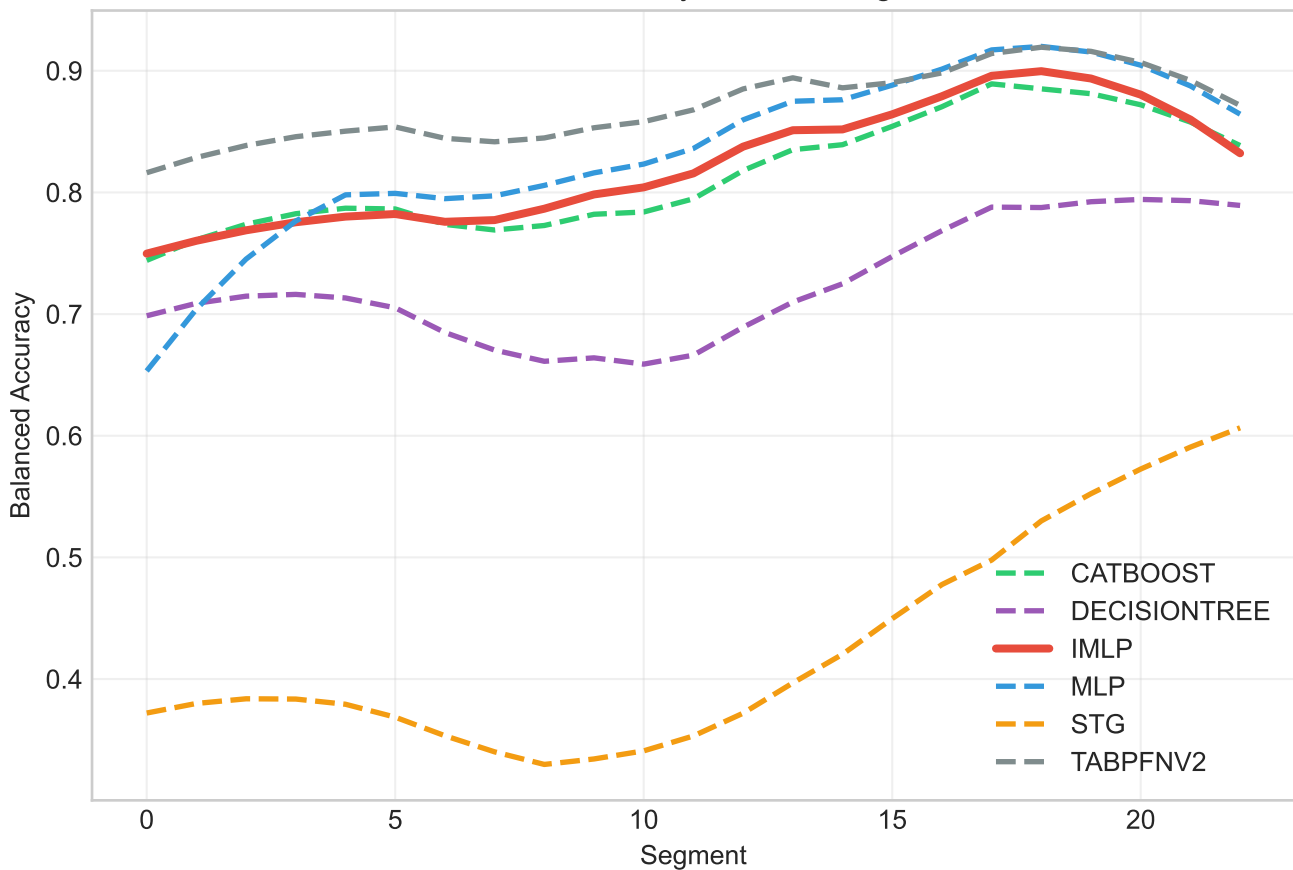

Supplement: supplementary_material [file balacc_trend.pdf › plotting/figures/balacc_trend.pdf]

Balanced Accuracy vs Segment

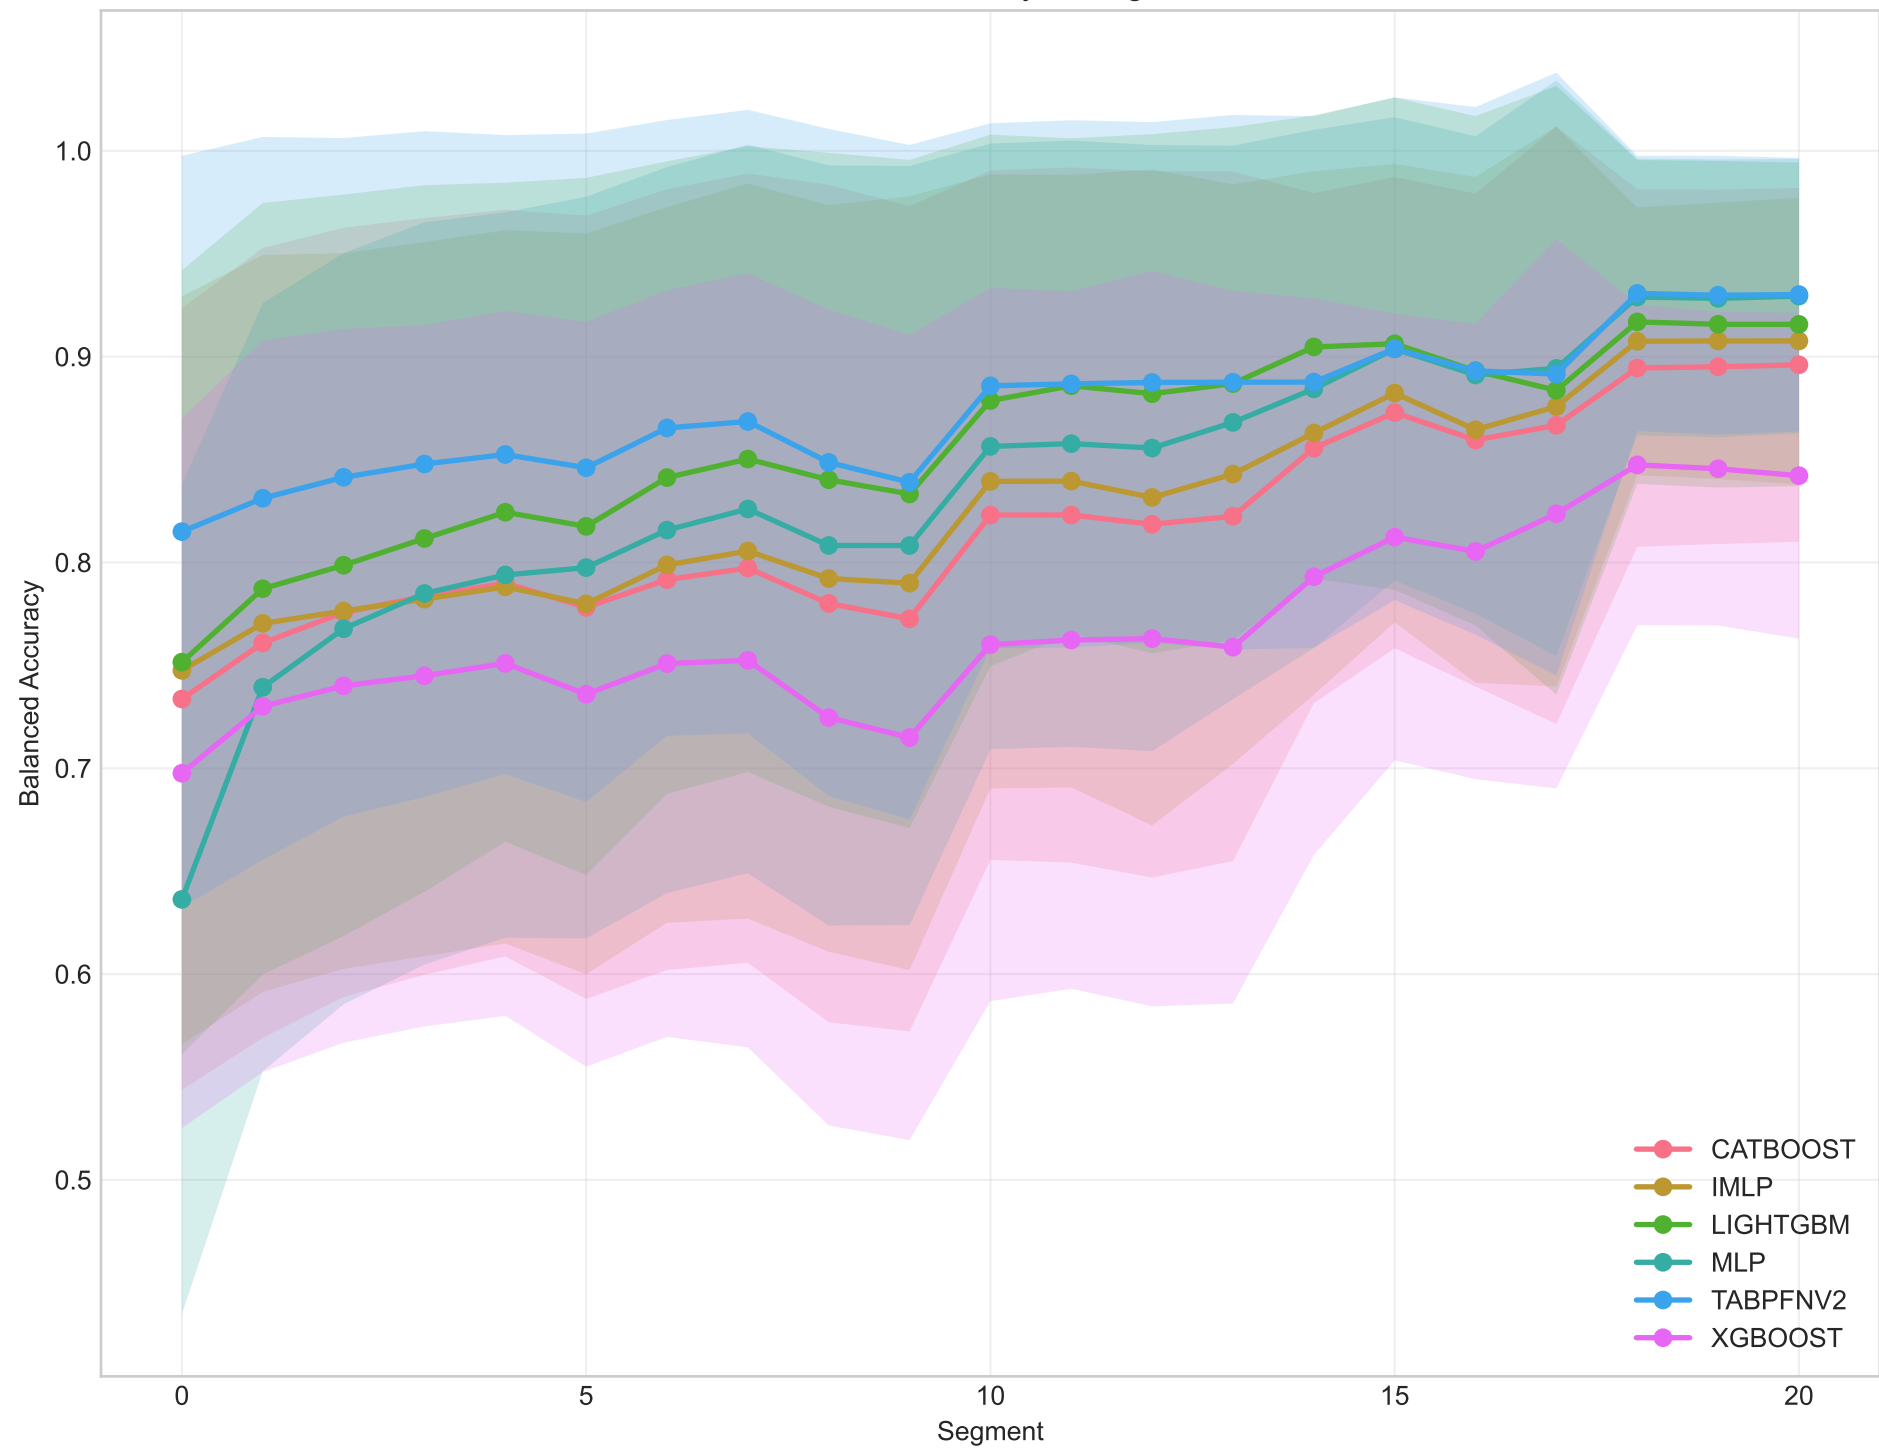

Supplement: supplementary_material [file segment_balanced_accuracy.pdf › plotting/figures/segment_balanced_accuracy.pdf]

Cumulative Energy (J) vs Segment

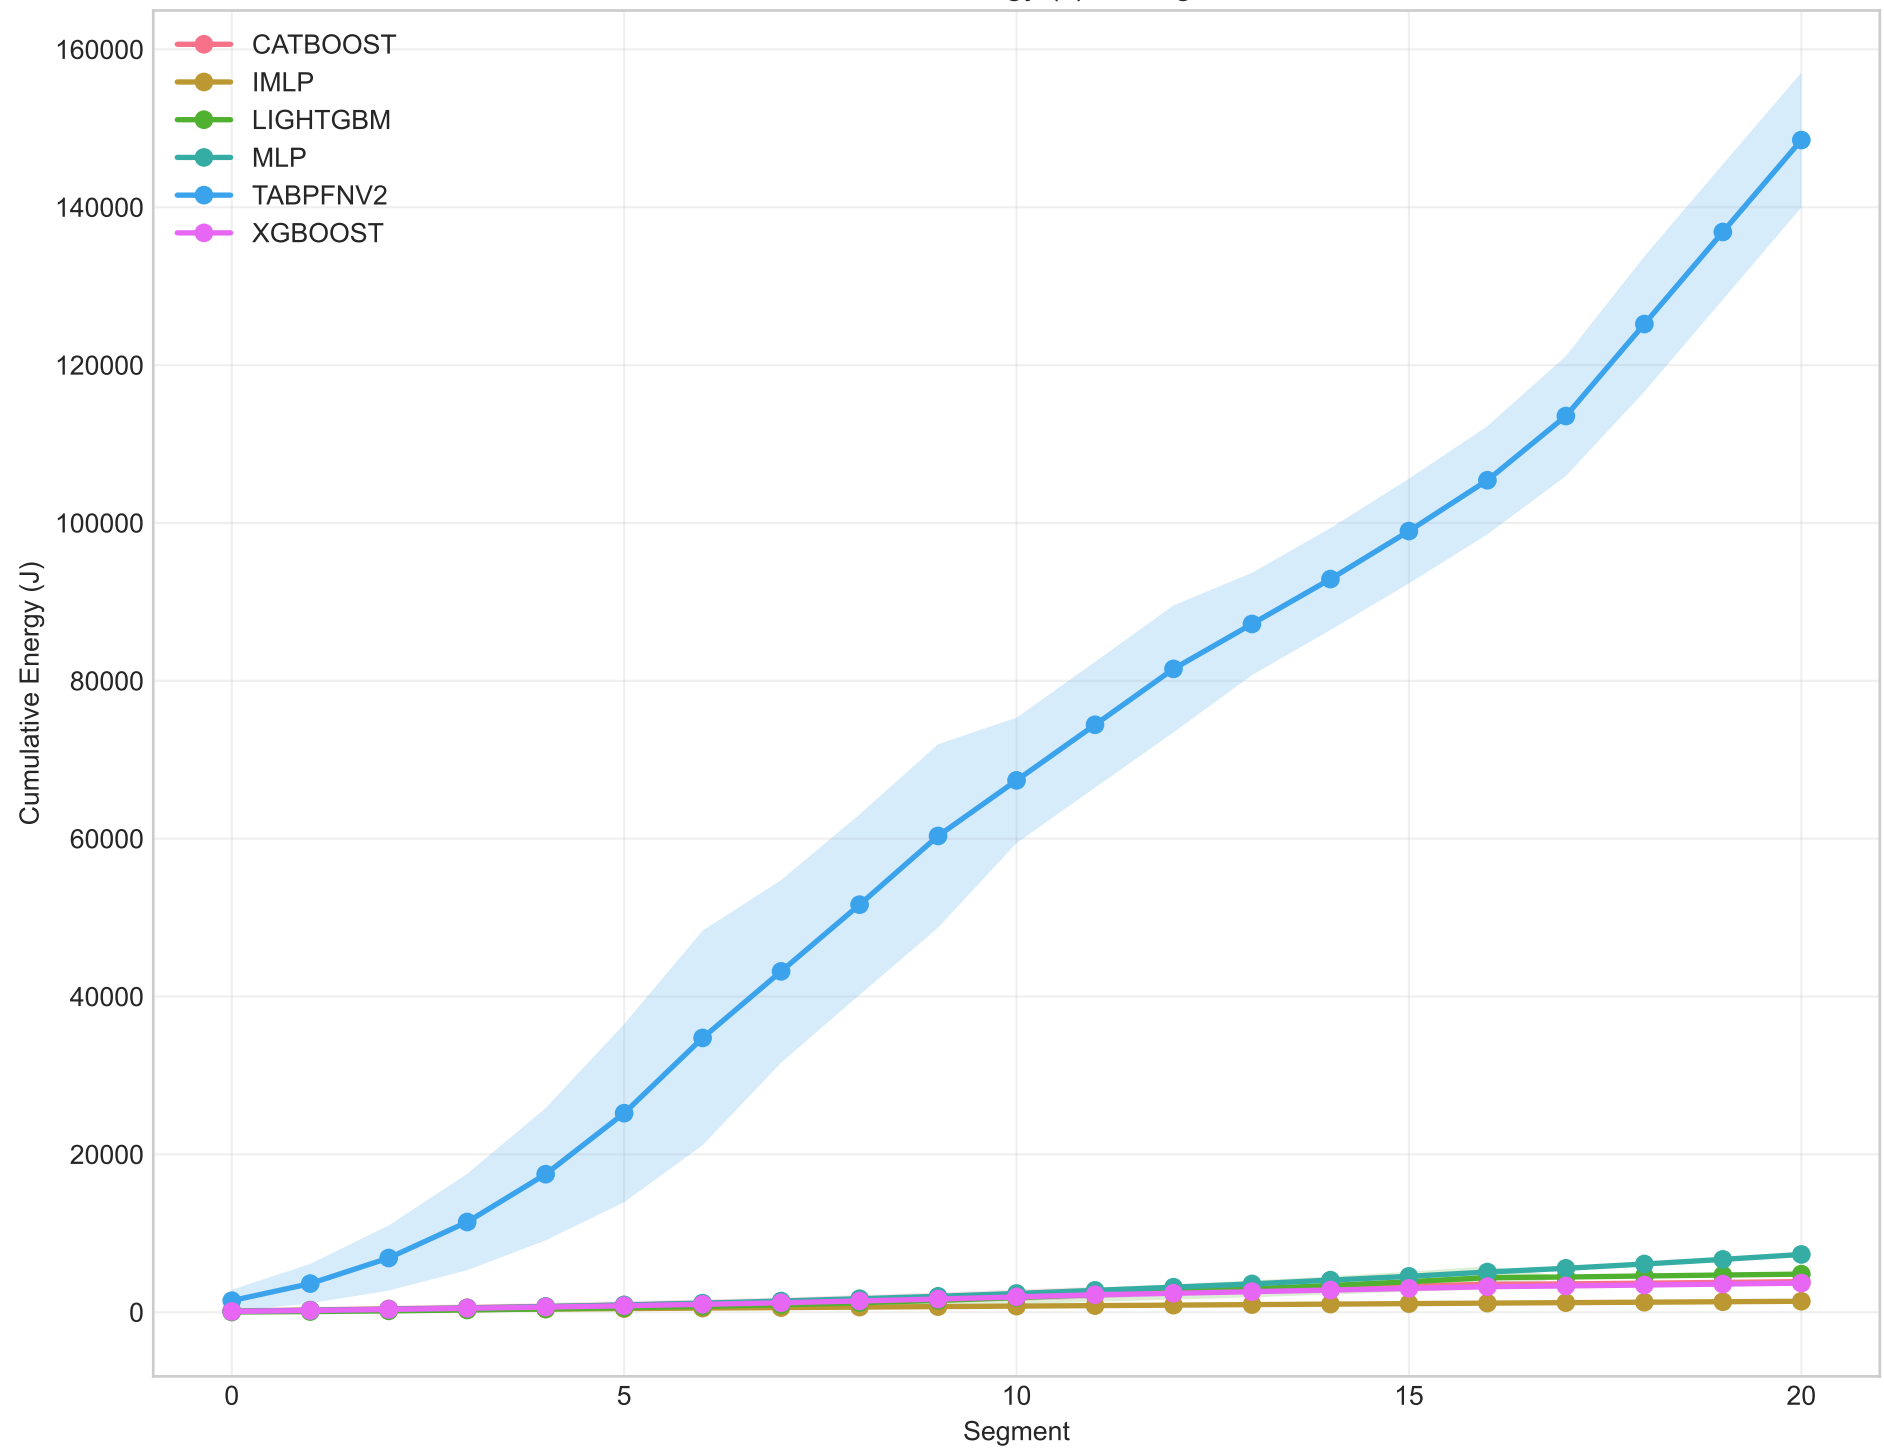

Supplement: supplementary_material [file segment_cumulative_energy.pdf › plotting/figures/segment_cumulative_energy.pdf]

# Training Instances vs Segment

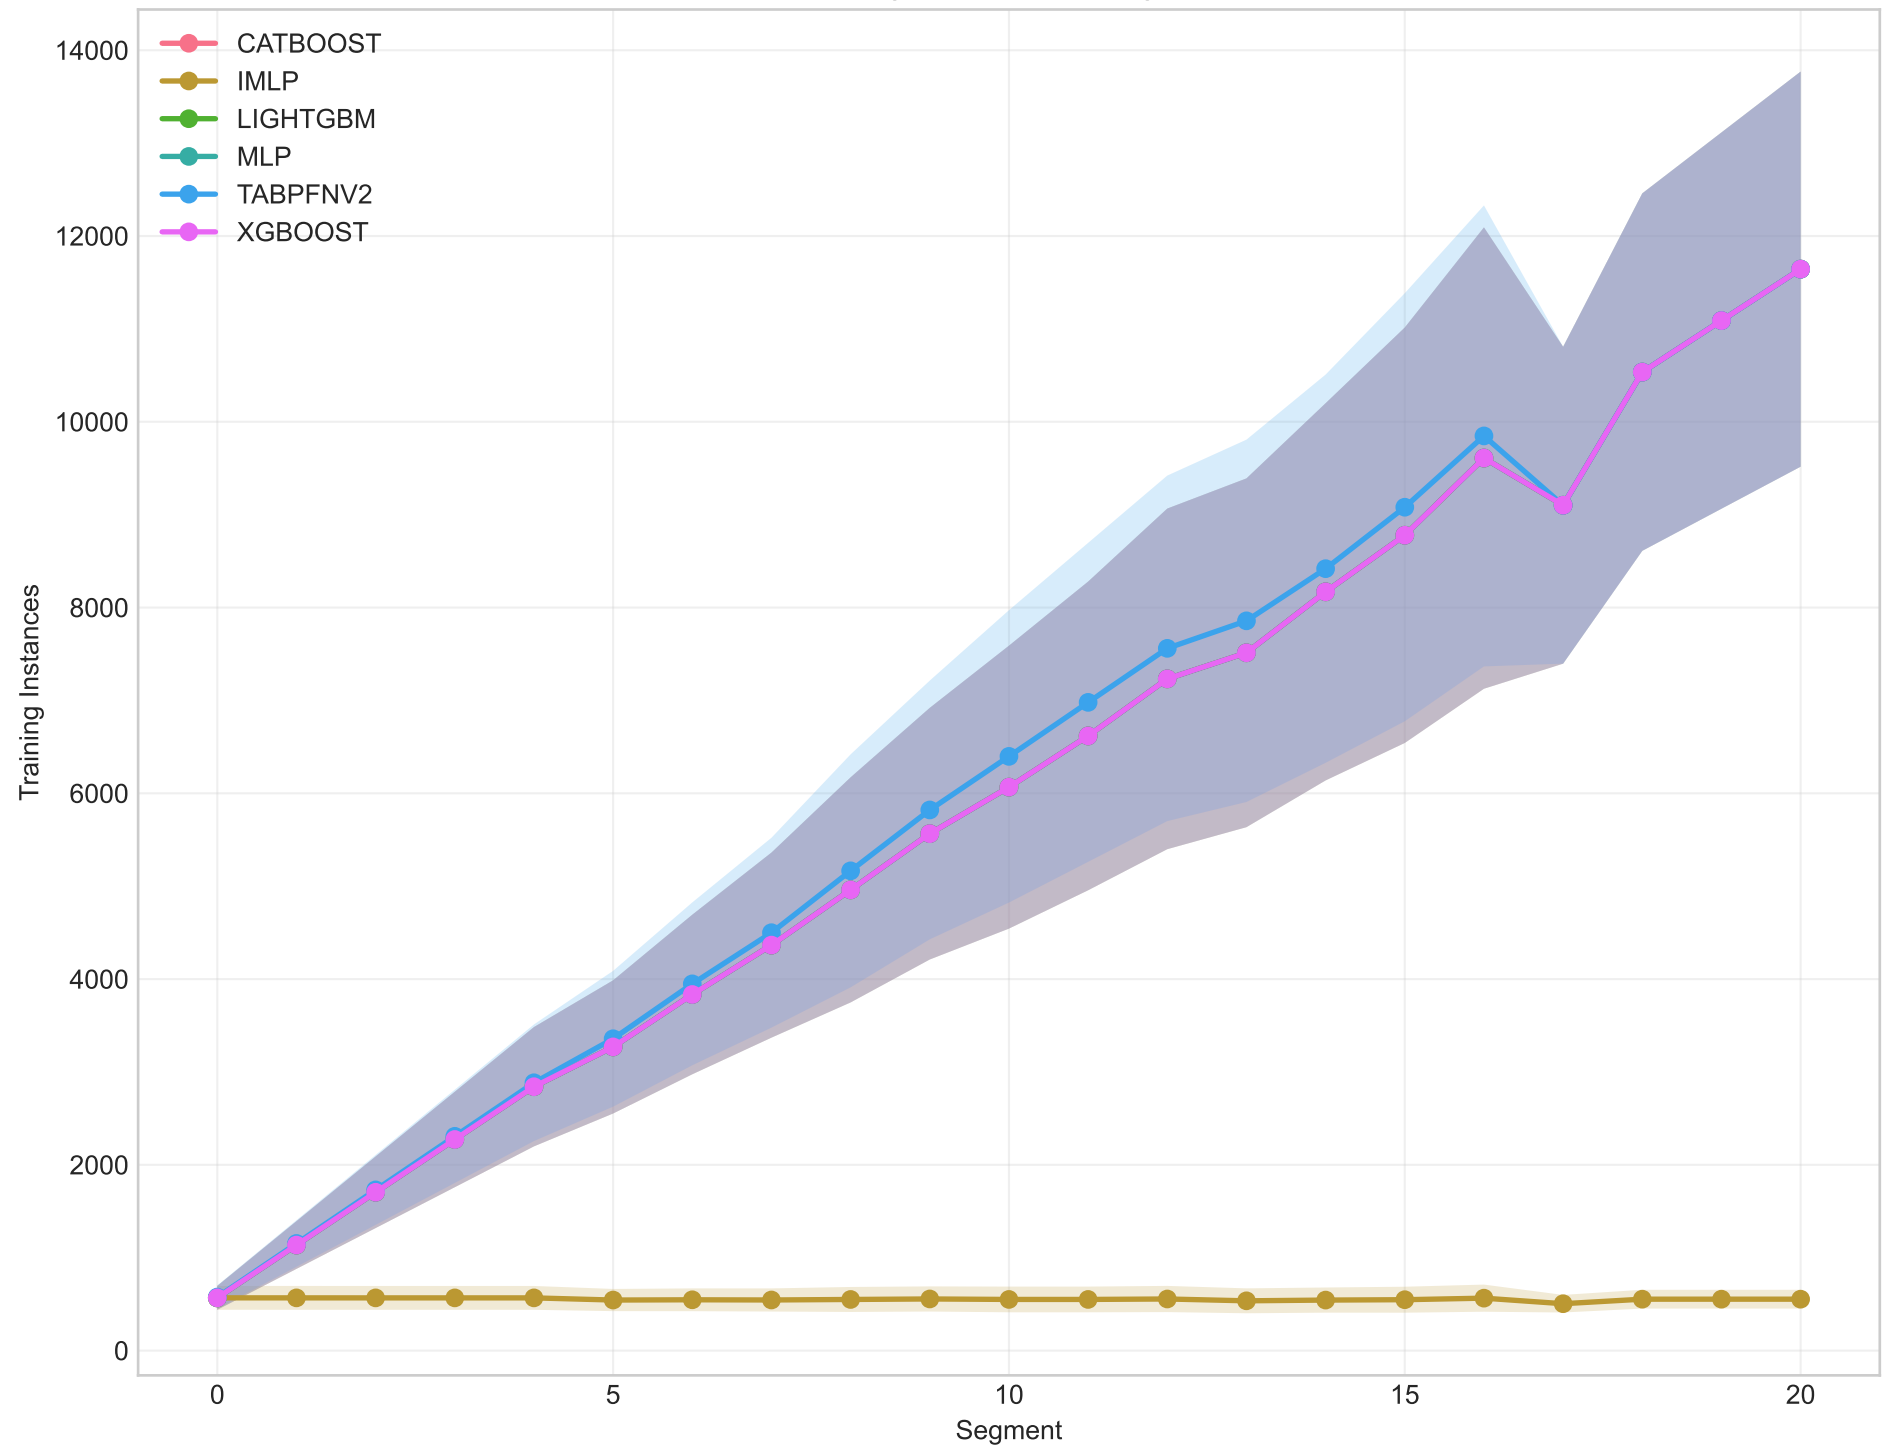

Supplement: supplementary_material [file segment_instances.pdf › plotting/figures/segment_instances.pdf]

Training Time (s) vs Segment

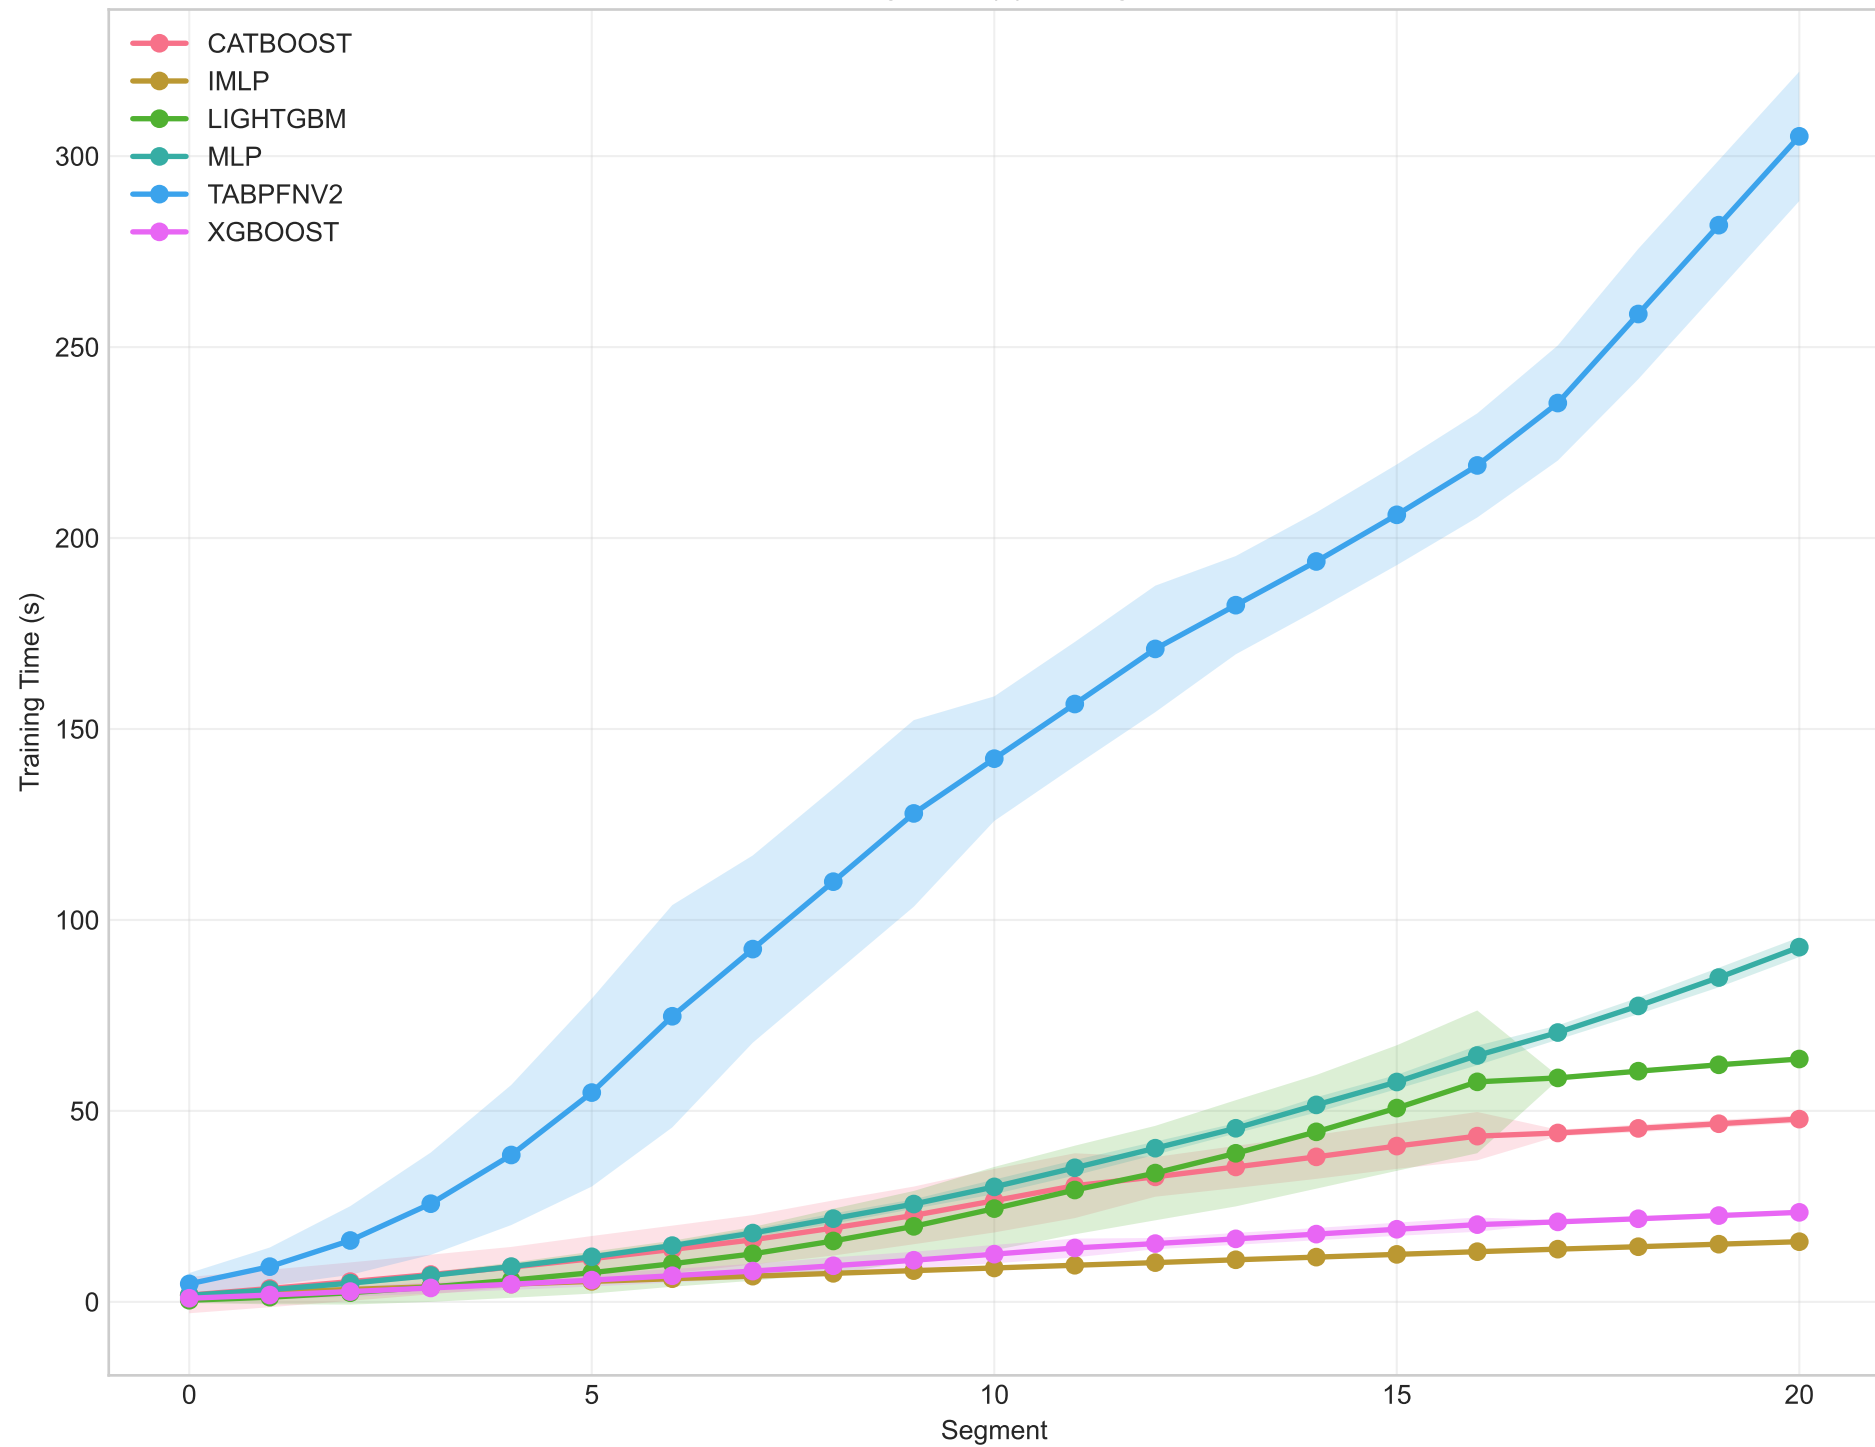

Supplement: supplementary_material [file segment_training_time.pdf › plotting/figures/segment_training_time.pdf]

# Pareto Frontier: Neural Network Models

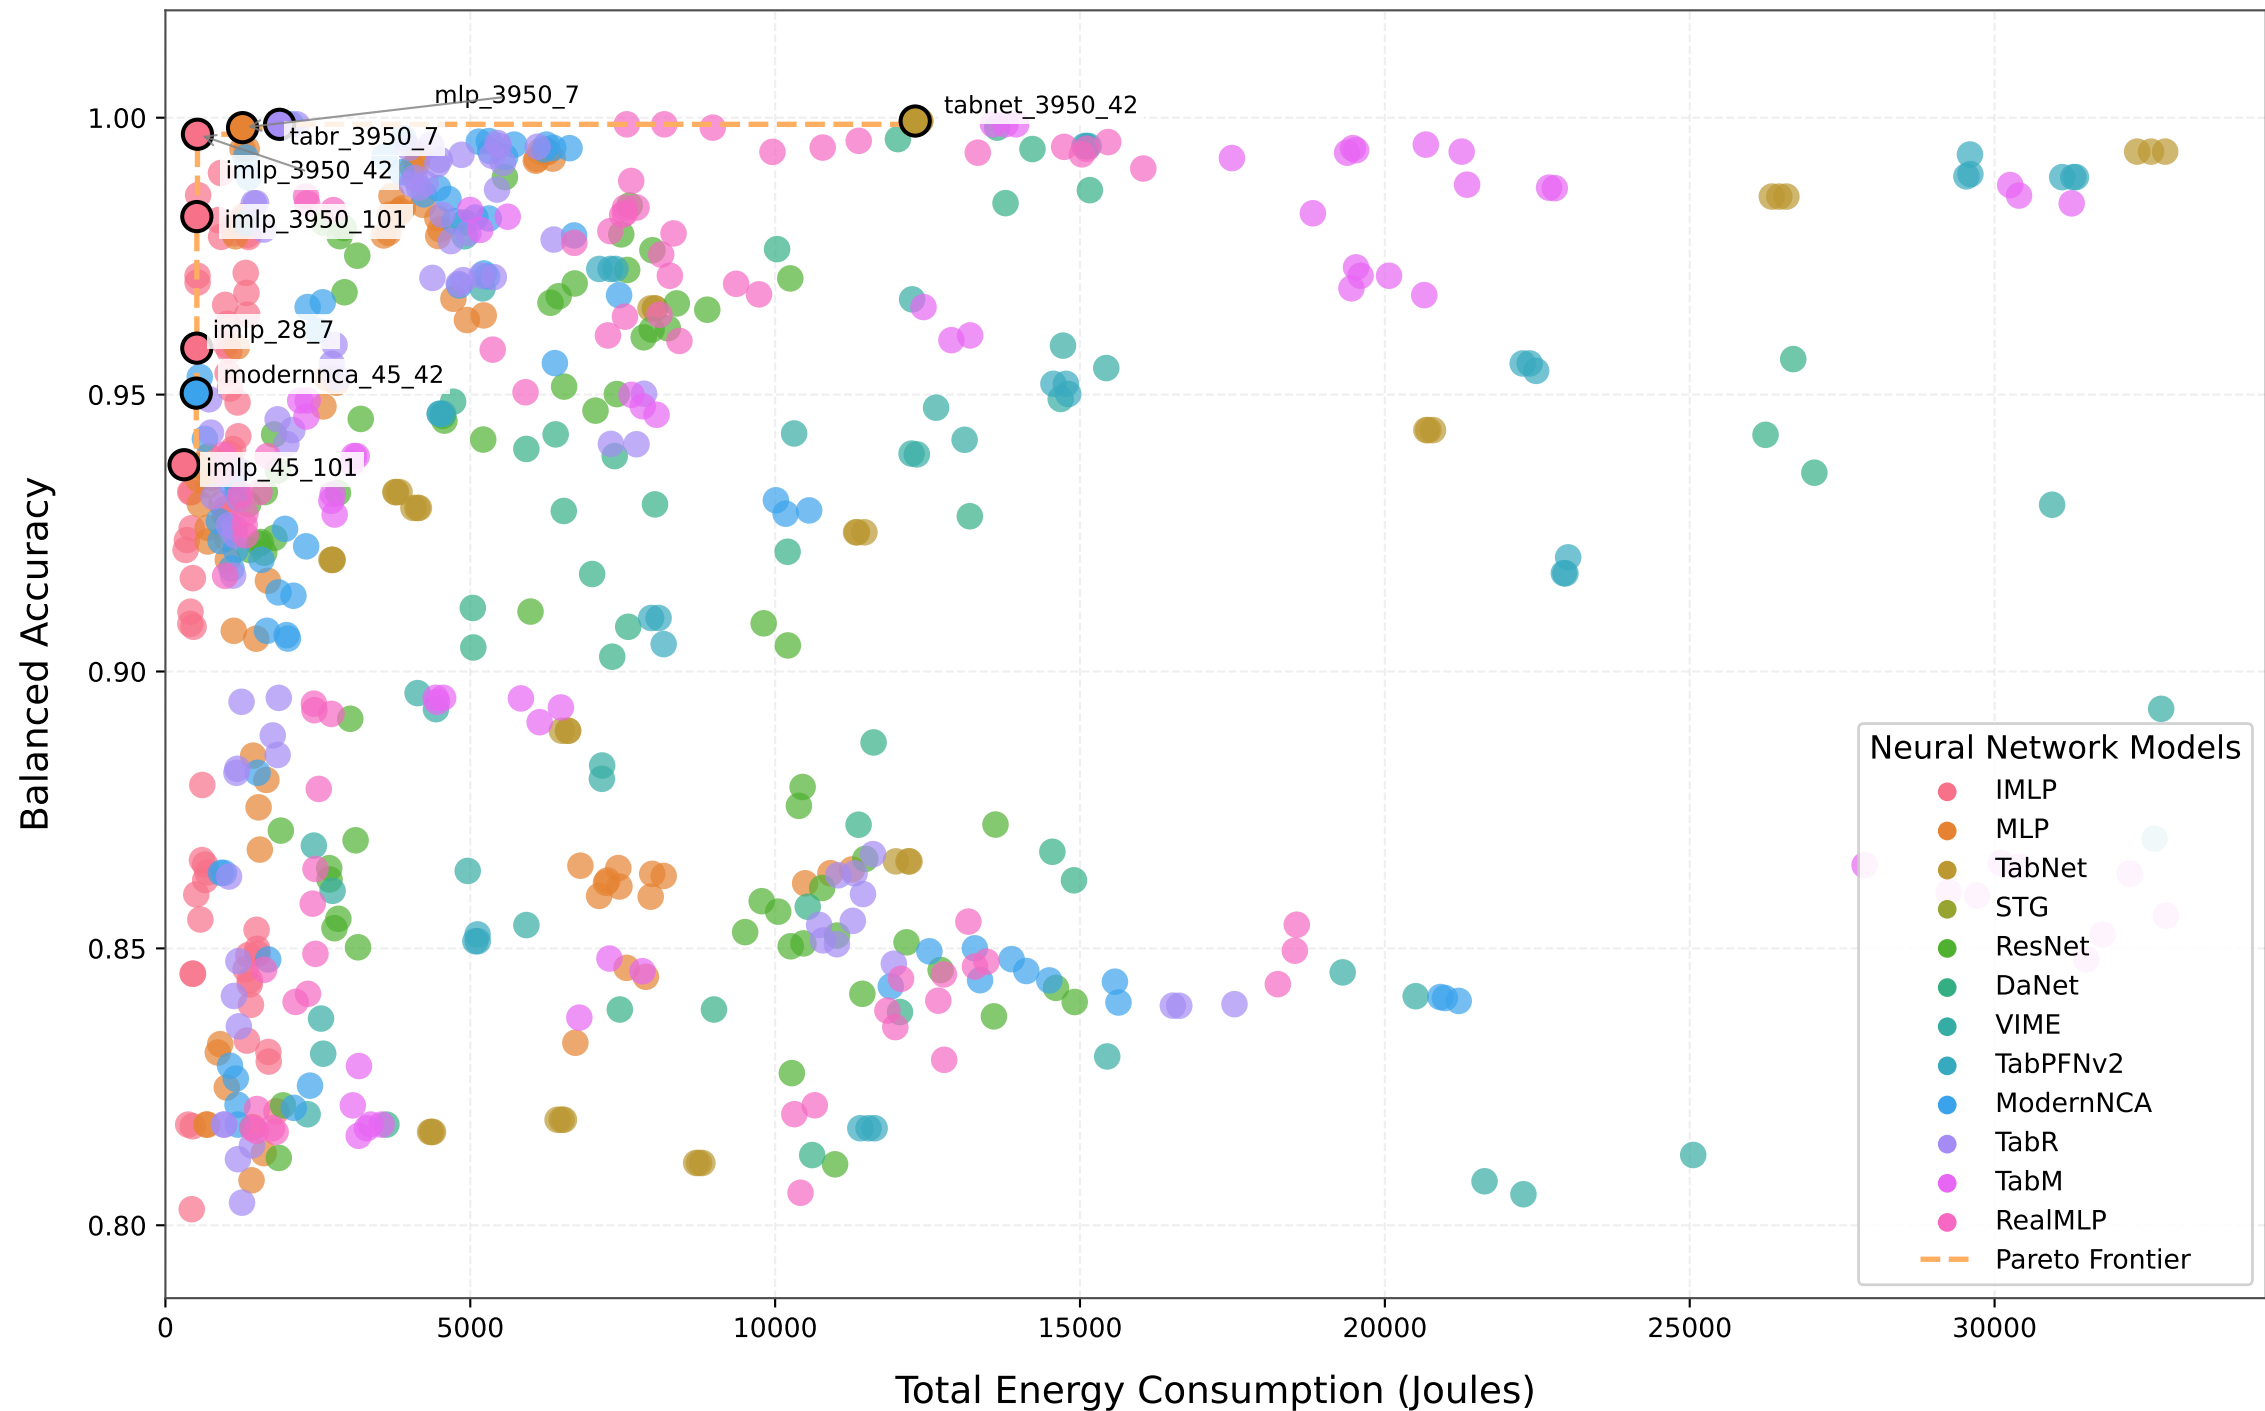

Supplement: supplementary_material [file nn_pareto_frontier.pdf › plotting/nn_pareto_frontier.pdf]

Pareto Frontier: Energy Efficiency vs. Model Accuracy

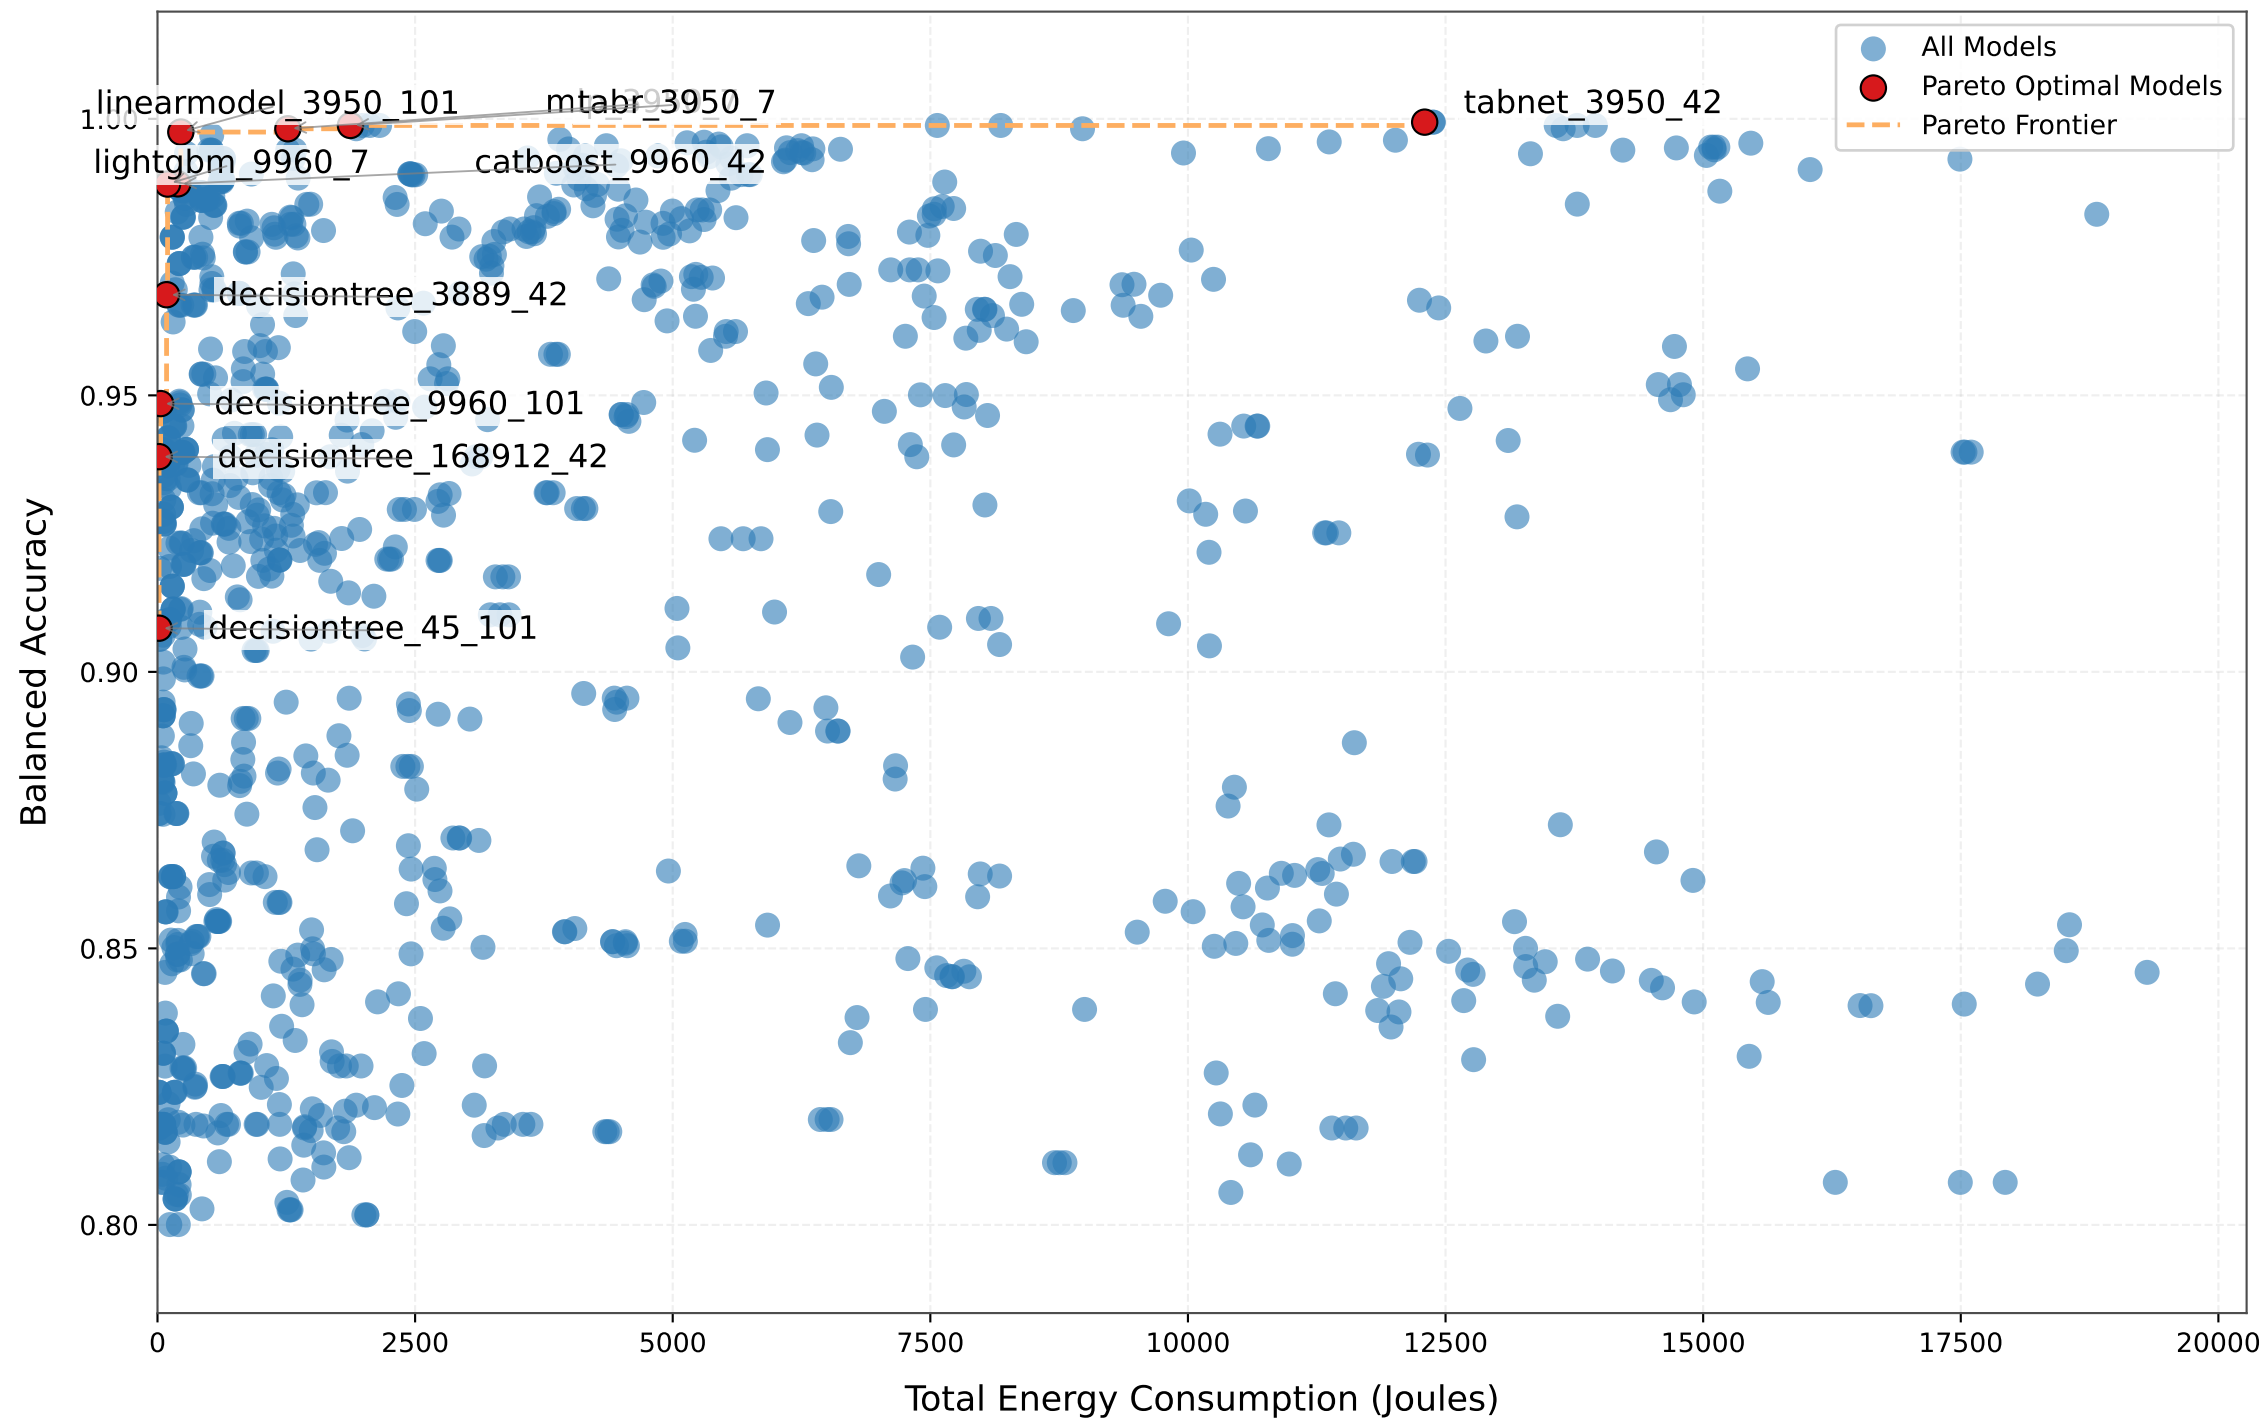

Supplement: supplementary_material [file pareto_frontier_filtered.pdf › plotting/pareto_frontier_filtered.pdf]

Balanced Accuracy

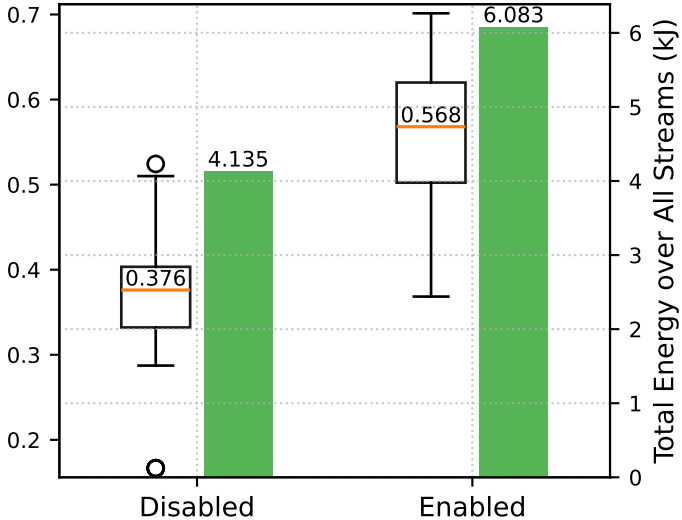

Supplement: supplementary_material [file attention_setting_comparison.pdf › results_ablation/notebooks/attention_setting_comparison.pdf]

Balanced Accuracy

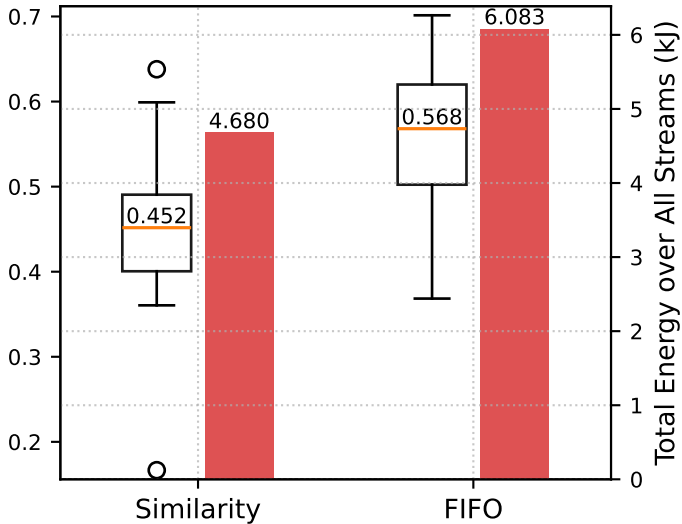

Supplement: supplementary_material [file buffer_setting_comparison.pdf › results_ablation/notebooks/buffer_setting_comparison.pdf]

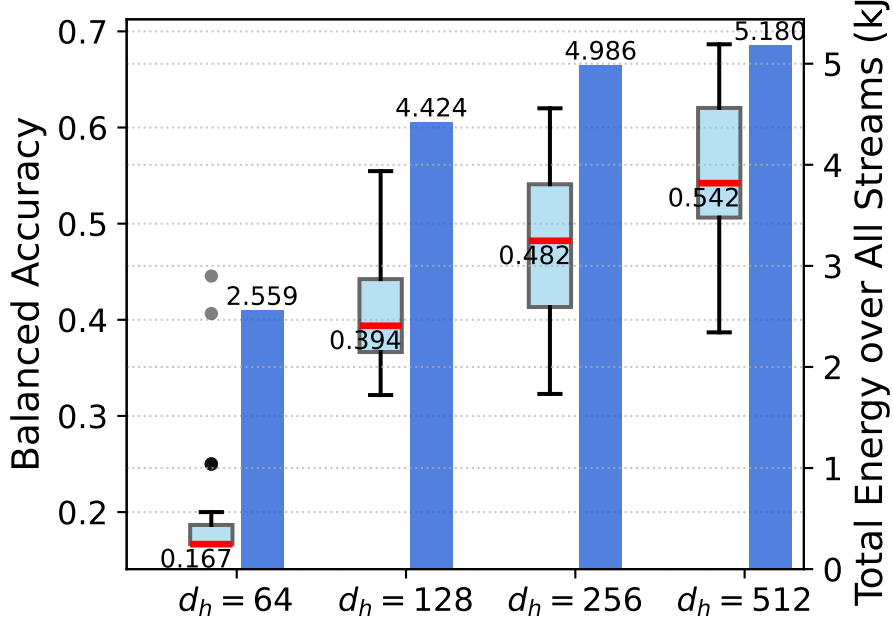

Supplement: supplementary_material [file dim_setting_comparison.pdf › results_ablation/notebooks/dim_setting_comparison.pdf]

Balanced Accuracy

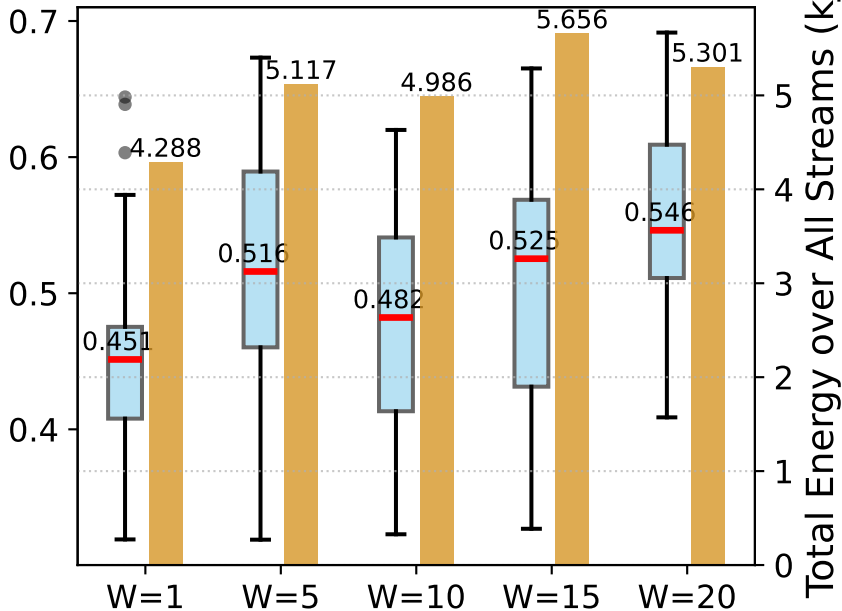

Supplement: supplementary_material [file window_size_comparison.pdf › results_ablation/notebooks/window_size_comparison.pdf]
